# Supplementary material for: Fragile X mental retardation protein is a Zika virus restriction factor that is antagonized by subgenomic flaviviral RNA
Source: eLife. 2018 Dec 4;7:e39023. doi: 10.7554/eLife.39023 (PMC6279352; doi:10.7554/eLife.39023)
Supplement: Figure 2—source data 1. [file elife-39023-fig2-data1.xlsx]

## Sheet: Panel B
Figure 2 panel B-Densitometry
EXP1 ZIKV-Dakar				IP/Input Ratio			IP/Input Ratio Normalized to gRNA
					gRNA	sfRNA		gRNA	sfRNA
	Signal			EXP1	0.195261	3.06641	EXP1	1.76559	27.7272
input gRNA	211			EXP2	0.0293392	4.78889	EXP2	0.265292	43.3023
IP gRNA	41.2			EXP3	0.107176	2.03	EXP3	0.969115	18.3557
Input sfRNA	512			average	0.110592	3.2951	average	1	29.7951
IP sfRNA	1570			S.D.	0.0830134	1.39359	S.D.	0.750627	12.6012
				S.E.	0.0586994	0.985417	S.E.	0.530774	8.91037
EXP2 ZIKV-Dakar								p value	0.0084
	Signal
input gRNA	227
IP gRNA	6.66
Input sfRNA	900
IP sfRNA	4310
EXP3 ZIKV-Dakar
	signal
Input gRNA	850
IP gRNA	91.1
Input sfRNA	10000
IP sfRNA	20300
EXP1 ZIKV-Cambodia					IP/Input Ratio			IP/Input Ratio Normalized to gRNA
					gRNA	sfRNA		gRNA	sfRNA
	Signal			EXP1	0.0783694	1.54181	EXP1	1.104	21.7196
input gRNA	601			EXP2	0.00334152	0.392233	EXP2	0.0470723	5.52542
IP gRNA	47.1			EXP3	0.13125	1.94927	EXP3	1.84893	27.4595
Input sfRNA	2990			average	0.070987	1.29443	average	1	18.2348
IP sfRNA	4610			S.D.	0.064273	0.807454	S.D.	0.90542	11.3747
				S.E.	0.037108	0.466184	S.E.	0.522744	6.56717
								p value	0.0295
EXP2 ZIKV-Cambodia
	Signal
input gRNA	4070000
IP gRNA	13600
Input sfRNA	10300000
IP sfRNA	4040000
EXP2 ZIKV-Cambodia
	Signal
input gRNA	144
IP gRNA	18.9
Input sfRNA	749
IP sfRNA	1460
EXP1 ZIKV-Puerto Rico					IP/Input Ratio			IP/Input Ratio Normalized to gRNA
					gRNA	sfRNA		gRNA	sfRNA
	Signal			exp1	0.0973301	1.59851		1	16.4236
input gRNA	412
IP gRNA	40.1
Input sfRNA	2690
IP sfRNA	4300

## Sheet: Panel D
Code	mouse 107										mouse 93
Amplified region	3'UTR					orf					3'UTR					orf
CT value
		IgG	FMRP				IgG	FMRP				IgG	FMRP				IgG	FMRP
Technical Replicate 1		31.753	29.4771				24.3095	23.9007				29.9323	27.8147				27.7201	26.4544
Technical Replicate 2		31.687	29.5449				24.7565	23.7635				29.6062	27.9448				27.6675	26.4578
Technical Replicate 3		31.944	29.7569				25.1215	24.2088				29.3539	27.7827				27.9626	26.4261
average		31.7947	29.593				24.7292	23.9577				29.6308	27.8474				27.7834	26.4461
Δ CT (Using IgG as normalizer)
Technical Replicate 1		-0.0416743	-2.31754				-0.419682	-0.828493				0.301465	-1.81607				-0.0633176	-1.329
Technical Replicate 2		-0.107657	-2.24981				0.0273342	-0.965681				-0.0246251	-1.68595				-0.115875	-1.32554
Technical Replicate 3		0.149331	-2.0378				0.392347	-0.520357				-0.27684	-1.84806				0.179192	-1.35724
ΔΔ CT
Technical Replicate 1		1.02931	4.9848				1.33763	1.77583				0.811428	3.5212				1.04487	2.51229
Technical Replicate 2		1.07748	4.75621				0.981232	1.95299				1.01722	3.21751				1.08363	2.50627
Technical Replicate 3		0.901668	4.1062				0.761889	1.43431				1.21154	3.60016				0.883197	2.56194
Average		1.00282	4.61574				1.02692	1.72104				1.01339	3.44629				1.0039	2.52683
S.D.		0.0908486	0.455836				0.290578	0.263642				0.200082	0.20202				0.106312	0.0305531
FMRP viral genome enrichment
	3' UTR			orf
	IgG	FMRP		IgG	FMRP
EXP1	1.02931	4.9848		1.33763	1.77583
	1.07748	4.75621		0.981232	1.95299
	0.901668	4.1062		0.761889	1.43431
EXP2	0.811428	3.5212		1.04487	2.51229
	1.01722	3.21751		1.08363	2.50627
	1.21154	3.60016		0.883197	2.56194
Average	1.00811	4.03101		1.01541	2.12394
S.D.	0.139097	0.713947		0.196097	0.472194
