# Supplementary material for: Fragile X mental retardation protein is a Zika virus restriction factor that is antagonized by subgenomic flaviviral RNA
Source: eLife. 2018 Dec 4;7:e39023. doi: 10.7554/eLife.39023 (PMC6279352; doi:10.7554/eLife.39023)
Supplement: Figure 3—source data 1. [file elife-39023-fig3-data1.xlsx]

## Sheet: Panel B
Figure 3 Panel B-Plaque assay			PFU/mL
exp1		siControl	siFMR1_2	siFMR1_3	si_FMR1_4	siFMR1_10	siFMR1_pool		exp2		siControl	siFMR1_2	siFMR1_3	si_FMR1_4	siFMR1_10	siFMR1_pool
	Replicate 1	100000	1000000	650000	1150000	800000	900000			Replicate 1	500000	2950000	1500000	1000000	1000000	2500000
	Replicate 2	150000	1200000	800000	850000	450000	1500000			Replicate 2	850000	1800000	1150000	1750000	1100000	2150000
	Replicate 3	450000	1500000	750000	850000	750000	1150000			Replicate 3	350000	2125000	1725000	1400000	800000	2875000
	Average	233333	1.23333e+06	733333	950000	666667	1.18333e+06			Average	566667	2.29167e+06	1.45833e+06	1.38333e+06	966667	2.50833e+06
	S.D.	189297	251661	76376.3	173205	189297	301386			S.D.	256580	592839	289756	375278	152753	362572
		siControl	siFMR1_2	siFMR1_3	si_FMR1_4	siFMR1_10	siFMR1_pool
exp1	Replicate 1	100000	1000000	650000	1150000	800000	900000
	Replicate 2	150000	1200000	800000	850000	450000	1500000
	Replicate 3	450000	1500000	750000	850000	750000	1150000
exp2	Replicate 1	500000	2950000	1500000	1000000	1000000	2500000
	Replicate 2	850000	1800000	1150000	1750000	1100000	2150000
	Replicate 3	350000	2125000	1725000	1400000	800000	2875000
	average	400000	1762500	1.09583e+06	1.16667e+06	816667	1.84583e+06
	S.D.	272029	708475	440005	353082	225093	784604
	S.E.	111056	289234	179631	144145	91893.7	320313
		siControl vs:	siFMR1_2	siFMR1_3	si_FMR1_4	siFMR1_10	siFMR1_pool
	p value		0.0019317	0.00516859	0.00102929	0.00832146	0.00247032

## Sheet: Panel C
Figure 3 panel C-Percentage of infection ZIKV-Dakar
Mean Fluorescence Intensities of envelope protein
	EXP 1	NI	siControl	siFMR1_2	siFMR1_3	siFMR1_4	siFMR1_10	siFMR1_pool			EXP2	NI	siControl	siFMR1_2	siFMR1_3	siFMR1_4	siFMR1_10	siFMR1_pool
	Replicate 1	0.33	4.39	15	10.7	12.5	10.6	19.9			Replicate 1	0.61	6.42	28.3	28.7	24.6	15.1	30.9
	Replicate 2	0.33	3.5	11.7	9.55	9.24	9.74	17.5			Replicate 2	0.6	5.25	21.1	27	12.3	17.4	34.2
	Replicate 3	0.32	4.35	11.9	10.1	9.98	10.2	18.5			Replicate 3	0.73	4.99	28.2	28.7	16.7	11.9	57.4
	average	0.326667	4.08	12.8667	10.1167	10.5733	10.18	18.6333			average	0.646667	5.55333	25.8667	28.1333	17.8667	14.8	40.8333
	S.D.	0.0057735	0.502693	1.85023	0.575181	1.70907	0.430349	1.20554			S.D.	0.0723418	0.76173	4.12836	0.981495	6.23244	2.76225	14.4417
	S.E.	0.00333333	0.29023	1.06823	0.332081	0.986734	0.248462	0.69602			S.E.	0.0417665	0.439785	2.38351	0.566667	3.5983	1.59478	8.33793
		NI	siControl	siFMR1_2	siFMR1_3	siFMR1_4	siFMR1_10	siFMR1_pool
EXP 1	Replicate 1	0.33	4.39	15	10.7	12.5	10.6	19.9
	Replicate 2	0.33	3.5	11.7	9.55	9.24	9.74	17.5
	Replicate 3	0.32	4.35	11.9	10.1	9.98	10.2	18.5
EXP2	Replicate 1	0.61	6.42	28.3	28.7	24.6	15.1	30.9
	Replicate 2	0.6	5.25	21.1	27	12.3	17.4	34.2
	Replicate 3	0.73	4.99	28.2	28.7	16.7	11.9	57.4
	average	0.486667	4.81667	19.3667	19.125	14.22	12.49	29.7333
	S.D.	0.181181	0.992163	7.67376	9.89433	5.7152	3.08697	15.2269
	S.E.	0.073967	0.405049	3.1328	4.03934	2.33322	1.26025	6.21636
			siControl vs:	siFMR1_2	siFMR1_3	si_FMR1_4	siFMR1_10	siFMR1_pool
		p value		0.00048553	0.0027482	0.00131995	8.68695e-05	0.00125965

## Sheet: Panel E and supplement 1
Figure 3-figure supplement 1 Percentage of infection MFI envelope protein
	exp1									exp2										exp3
		ZIKV-Cambodia		ZIKV-Puerto Rico		DENV-NGC					ZIKV-Cambodia		ZIKV-Puerto Rico		DENV-NGC					ZIKV-Cambodia		ZIKV-Puerto Rico		DENV-NGC
	NI	siControl	siFMR1	siControl	siFMR1	siControl	siFMR1			NI	siControl	siFMR1	siControl	siFMR1	siControl	siFMR1			ni	siControl	siFMR1	siControl	siFMR1	siControl	siFMR1
Replicate 1	0.57	7.46	16	3.39	18.8	10.7	13.2		Replicate 1	0.15	5.01	15.1	9.27	21	57.4	61.7		Replicate 1	0.2	6.77	12.8	23.7	42.3	33.5	46
Replicate 2	0.5	6.83	12	3.32	14.4	10.1	13		Replicate 2	0.33	4.63	15.2	9.19	20.7	56.9	63.2		Replicate 2	0.14	4.5	14.3	25.2	52.3	31.1	52
Average	0.535	7.145	14	3.355	16.6	10.4	13.1		Replicate 3	0.29	4.66	14.7	9.13	21.7	57.2	62.9		Replicate 3	0.2	5.08	9.92	20.7	40.1	29.2	45.4
Ratio	0.0494975	0.445477	2.82843	0.0494975	3.11127	0.424264	0.141421		Average	0.256667	4.76667	15	9.19667	21.1333	57.1667	62.6		Average		5.45	12.34	23.2	44.9	31.2667	47.8
									S.D.	0.0945163	0.211266	0.264575	0.0702377	0.51316	0.251661	0.793725		S.D.	0.034641	1.17936	2.22594	2.29129	6.50231	2.15484	3.64966
Normalized vs siControl
		ZIKV-Cambodia		ZIKV-Puerto Rico		DENV-NGC
	NI	siControl	siFMR1	siControl	siFMR1	siControl	siFMR1
EXP1 replicate 1	0.0797761	1.04409	2.23933	1.01043	5.60358	1.02885	1.26923
EXP1 replicate 2	0.069979	0.955913	1.6795	0.989568	4.2921	0.971154	1.25
EXP2 replicate 1	0.0314685	1.05105	3.16783	1.00797	2.28344	1.00408	1.0793
EXP2 replicate 2	0.0692308	0.971329	3.18881	0.999275	2.25082	0.995335	1.10554
EXP2 replicate 3	0.0608392	0.977622	3.08392	0.992751	2.35955	1.00058	1.10029
EXP3 replicate 1	0.0366972	1.2422	2.34862	1.02155	1.82328	1.07143	1.47122
EXP3 replicate 2	0.0256881	0.825688	2.62385	1.08621	2.25431	0.99467	1.66311
EXP replicate 3	0.0366972	0.93211	1.82018	0.892241	1.72845	0.933902	1.45203
average	0.051297	1	2.51901	1	2.82444	1	1.29884
S.D.	0.0208671	0.120399	0.597627	0.0532412	1.3755	0.0400042	0.211836
p value		4.70893e-06		0.00152849		0.00381588
Figure 3 panel E- plaque assay ZIKV-Cambodia PFU/mL ZIKV-Puerto Rico PFU/mL DENV-NGC FFU/mL
ZIKV-Cambodia										ZIKV-Puerto Rico									DENV
exp1			exp2			exp3			exp1			exp2			exp3			exp 1
	siControl	siFMR1		siControl	siFMR1		siControl	siFMR1		siControl	siFMR1		siControl	siFMR1		siControl	siFMR1		siControl	siFMR1
Replicate 1	85000	100000		100000	500000		50000	200000	Replicate 1	202500	800000		95000	650000		350000	850000	Replicate 1	1500	3000
Replicate 2	90000	110000		105000	450000		40000	200000	Replicate 2	200000	1100000		100000	200000		300000	900000	Replicate 2	2000	1500
Replicate 3	80000	130000		100000	450000		50000	350000	Replicate 3	85000	900000		65000	400000		350000	700000	Replicate 3	1500	500
Average	85000	113333		101667	466667		46666.7	250000	Average	162500	933333		86666.7	416667		333333	816667	Average	1666.67	1666.67
SD	5000	15275.3		2886.75	28867.5		5773.5	86602.5	SD	67128.6	152753		18929.7	225462		28867.5	104083	SD	288.675	1258.31
p value	0.0189531			1.31194e-05			0.00768916			0.00066137			0.0324619			0.000746555			0.5
Normalized vs siControl
ZIKV-Cambodia										ZIKV-Puerto Rico									DENV
exp1			exp2			exp3			exp1			exp2			exp3			exp 1
	siControl	siFMR1		siControl	siFMR1		siControl	siFMR1		siControl	siFMR1		siControl	siFMR1		siControl	siFMR1		siControl	siFMR1
Replicate 1	1	1.17647		0.983607	4.91803		1.07143	4.28571	Replicate 1	1.24615	4.92308		1.09615	7.5		1.05	2.55	Replicate 1	0.9	1.8
Replicate 2	1.05882	1.29412		1.03279	4.42623		0.857143	4.28571	Replicate 2	1.23077	6.76923		1.15385	2.30769		0.9	2.7	Replicate 2	1.2	0.9
Replicate 3	0.941176	1.52941		0.983607	4.42623		1.07143	7.5	Replicate 3	0.523077	5.53846		0.75	4.61538		1.05	2.1	Replicate 3	0.9	0.3
Average	1	1.33333		1	4.59016		1	5.35714	Average	1	5.74359		1	4.80769		1	2.45	Average	1	1
SD	0.0588235	0.179709		0.0283943	0.283943		0.123718	1.85577	SD	0.413099	0.940016		0.21842	2.60149		0.0866025	0.31225	SD	0.173205	0.754983
