# Supplementary material for: Fragile X mental retardation protein is a Zika virus restriction factor that is antagonized by subgenomic flaviviral RNA
Source: eLife. 2018 Dec 4;7:e39023. doi: 10.7554/eLife.39023 (PMC6279352; doi:10.7554/eLife.39023)
Supplement: Figure 4—source data 1. [file elife-39023-fig4-data1.xlsx]

## Sheet: Panel A,B and D
Figure 4 Panel A- Luciferase signal ZIKV reporter 3.5 hpi siControl and siFMR1
	exp1										exp2										exp3
	no nitd				plus nitd						no nitd				plus nitd						no nitd				plus nitd
RLU signal	Non Infected	siControl + CHX	siControl	siFMR1	Non Infected	siControl + CHX	siControl	siFMR1		RLU signal	Non Infected	siControl + CHX	siControl	siFMR1	Non Infected	siControl + CHX	siControl	siFMR1		RLU signal	Non Infected	siControl + CHX	siControl	siFMR1	Non Infected	siControl + CHX	siControl	siFMR1
Replicate 1	9.25561	106.11	326.98	1059.47	5.4876	122.606	383.365	948.221		Replicate 1		10902.2	23123.8	50163.8	33.9335	17705.5	30970.6	45097.2		Replicate 1	169.452	4203.83	14810.6	51538.2	202.619	4932.51	16496.9	50559.3
Replicate 2	8.83248	107.71	338.357	981.483	5.55015	207.072	320.762	645.928		Replicate 2	22.8364	16170.4	23628.6	44823.2	37.4521	13889.1	25401.8	39359.8		Replicate 2	132.34	5656.42	20896.8	55400.5	200.249	4447.72	14653.8	46404.9
Replicate 3	7.64017	157.65	306.122	1250.03	5.48074	124.399	351.175	951.593		Replicate 3	54.4075	17204	22997.6	54545.7	58.7138	11157.5	27623.8	51918.5		Replicate 3	198.034	4883.63	17687.7	62955	207.531	4970.93	17482.6	65726.4
average	8.57609	123.823	323.82	1097	5.50617	151.359	351.767	848.581		average	38.622	14758.9	23250	49844.2	43.3665	14250.7	27998.7	45458.5		average	166.609	4914.63	17798.4	56631.2	203.466	4783.72	16211.1	54230.2
SD	0.837687	29.3054	16.3483	138.151	0.0382479	48.2572	31.3058	175.51		SD	22.3241	3379.69	333.851	4869.12	13.4071	3288.93	2803.28	6287.13		SD	32.9391	726.791	3044.6	5807.07	3.71467	291.618	1435.86	10170.4
SE	0.483639	16.9195	9.43871	79.7617	0.0220824	27.8613	18.0744	101.331		SE	12.8888	1951.27	192.749	2811.19	7.7406	1898.86	1618.47	3629.87		SE	19.0174	419.613	1757.8	3352.71	2.14467	168.366	828.995	5871.86
																				p value			siControl vs siFMR1	0.003			siControl vs siFMR1	0.003
luciferase signal substracting background (RLU from siControl+CHX)
	exp1										exp2										exp3
			no nitd				plus nitd						no nitd				plus nitd						no nitd				plus nitd
			siControl	siFMR1			siControl	siFMR1					siControl	siFMR1			siControl	siFMR1					siControl	siFMR1			siControl	siFMR1
		Replicate 1	203.157	935.649		Replicate 1	232.006	796.862				Replicate 1	8364.97	35404.9		Replicate 1	16719.9	30846.6				Replicate 1	9896	46623.5		Replicate 1	11713.2	45775.6
		Replicate 2	214.534	857.66		Replicate 2	169.403	494.569				Replicate 2	8869.68	30064.3		Replicate 2	11151.1	25109.2				Replicate 2	15982.2	50485.8		Replicate 2	9870.09	41621.2
		Replicate 3	182.299	1126.21		Replicate 3	199.816	800.234				Replicate 3	8238.75	39786.8		Replicate 3	13373.1	37667.8				Replicate 3	12773.1	58040.4		Replicate 3	12698.8	60942.6
		average	199.996	973.173		average	200.408	697.222				average	8491.13	35085.3		average	13748.1	31207.9				average	12883.8	51716.6		average	11427.4	49446.5
		SD	16.3483	138.151		SD	31.3058	175.51				SD	333.851	4869.12		SD	2803.28	6287.13			Normalyzed vs siControl	SD	3044.6	5807.07		SD	1435.86	10170.4
Normalyzed vs siControl		Replicate 1	1.0158	4.67833		Replicate 1	1.15767	3.9762			Normalyzed vs siControl	Replicate 1	0.985142	4.16963		Replicate 1	1.21617	2.2437				Replicate 1	0.768099	3.61878		Replicate 1	1.02501	4.00579
		Replicate 2	1.07269	4.28838		Replicate 2	0.845288	2.46781				Replicate 2	1.04458	3.54067		Replicate 2	0.811106	1.82638				Replicate 2	1.24049	3.91857		Replicate 2	0.863725	3.64224
		Replicate 3	0.911509	5.63115		Replicate 3	0.997045	3.99302				Replicate 3	0.970277	4.68568		Replicate 3	0.972726	2.73987				Replicate 3	0.99141	4.50492		Replicate 3	1.11127	5.33305
		average	1	4.86595		average	1	3.47901				average	1	4.13199		average	1	2.26998				average	1	4.01409		average	1	4.32702
		SD	0.0817431	0.690769		SD	0.15621	0.875764				SD	0.0393176	0.573436		SD	0.203904	0.45731				SD	0.236313	0.450728		SD	0.125651	0.890001
Figure 4 Panel B-fold change normalized
			no nitd		plus nitd
			siControl	siFMR1	siControl	siFMR1
	Exp 1	Replicate 1	1.0158	4.67833	1.15767	3.9762
		Replicate 2	1.07269	4.28838	0.845288	2.46781
		Replicate 3	0.911509	5.63115	0.997045	3.99302
	Exp 2	Replicate 1	0.985142	4.16963	1.21617	2.2437
		Replicate 2	1.04458	3.54067	0.811106	1.82638
		Replicate 3	0.970277	4.68568	0.972726	2.73987
	Exp 3	Replicate 1	0.768099	3.61878	1.02501	4.00579
		Replicate 2	1.24049	3.91857	0.863725	3.64224
		Replicate 3	0.99141	4.50492	1.11127	5.33305
		average	1	4.33735	1	3.35867
		SD	0.126562	0.641926	0.142974	1.11516
		SE	0.0421873	0.213975	0.0476581	0.371721
		p value		2.01987e-07		8.23381e-05
translation efficiency: substracted RLU signal/relative amount of viral genome
	EXP1	no nitd		plus nitd			EXP2	no nitd		plus nitd
		siControl	siFMR1	siControl	siFMR1			siControl	siFMR1	siControl	siFMR1
RLU	Replicate 1	203.157	935.649	232.006	796.862		Replicate 1	9896	46623.5	11713.2	45775.6
	Replicate 2	214.534	857.66	169.403	494.569		Replicate 2	15982.2	50485.8	9870.09	41621.2
	Replicate 3	182.299	1126.21	199.816	800.234		Replicate 3	12773.1	58040.4	12698.8	60942.6
	Average	199.996	973.173	200.408	697.222		Average	12883.8	51716.6	11427.4	49446.5
		no nitd		plus nitd				no nitd		plus nitd
	EXP1	siControl	siFMR1	siControl	siFMR1		EXP2	siControl	siFMR1	siControl	siFMR1
Relative RNA viral genome	Replicate 1	0.00158963	0.00215906	0.0119992	0.00548373		Replicate 1	0.00454789	0.00580301	0.00554453	0.00578512
	Replicate 2	0.00216815	0.00254094	0.00905131	0.00975283		Replicate 2	0.00588371	0.00614268	0.00534945	0.00534444
	Replicate 3	0.00156247	0.00218195	0.00222012	0.00923389		Replicate 3	0.00548125	0.00614214	0.00584389	0.00480187
	Average	0.00177342	0.00229399	0.00775687	0.00815682		Average	0.00530428	0.00602928	0.00557929	0.00531047
		no nitd		plus nitd				no nitd		plus nitd
	EXP1	siControl	siFMR1	siControl	siFMR1		EXP2	siControl	siFMR1	siControl	siFMR1
RLU signal/viral genome=	Replicate 1	127802	433359	19335.1	145314		Replicate 1	2.17595e+06	8.03437e+06	2.11256e+06	7.91264e+06
Translation efficiency	Replicate 2	98947.8	337536	18715.8	50710.4		Replicate 2	2.71634e+06	8.21886e+06	1.84507e+06	7.78776e+06
	Replicate 3	116673	516148	90002	86662.7		Replicate 3	2.33032e+06	9.44954e+06	2.17301e+06	1.26914e+07
	Average	114474	429014	42684.3	94228.9		Average	2.40754e+06	8.56759e+06	2.04355e+06	9.46395e+06
Normalized translation efficiency vs siControl
		no nitd		plus nitd				no nitd		plus nitd
	EXP1	siControl	siFMR1	siControl	siFMR1		EXP2	siControl	siFMR1	siControl	siFMR1
	Replicate 1	1.11642	3.78565	0.45298	3.40438		Replicate 1	0.903807	3.33717	1.03377	3.87202
	Replicate 2	0.864368	2.94858	0.43847	1.18803		Replicate 2	1.12827	3.4138	0.902876	3.81091
	Replicate 3	1.01921	4.50886	2.10855	2.03032		Replicate 3	0.967927	3.92498	1.06335	6.2105
	Average	1	3.7477	1	2.20758		Average	1	3.55865	1	4.63114
	SD	0.127121	0.78083	0.96006	1.11876		SD	0.115615	0.319555	0.0854024	1.36811
		no nitd		plus nitd
Figure 4 panel D Translation efficiency		siControl	siFMR1	siControl	siFMR1
Exp1	Replicate 1	1.11642	3.78565	0.45298	3.40438
	Replicate 2	0.864368	2.94858	0.43847	1.18803
	Replicate 3	1.01921	4.50886	2.10855	2.03032
Exp2	Replicate 1	0.903807	3.33717	1.03377	3.87202
	Replicate 2	1.12827	3.4138	0.902876	3.81091
	Replicate 3	0.967927	3.92498	1.06335	6.2105
	Average	1	3.65317	1	3.41936
	SD	0.108677	0.543549	0.609593	1.73535
	SE	0.0443671	0.221903	0.248865	0.708453
	p value		0.002		0.009

## Sheet: Panel C
Figure 4 panel C-viral genome
qPCR for viral genome														EXP 2
EXP1			Cт	delta CT	delta delta CT	average siControl	Normalized vs siControl	Average	SD	SE					viral genome CT values						GAPDH
No NITD	SiControl	CAMBODIA	25.2485	9.2971	0.00158963	0.00177342	0.896363	1	0.192915	0.11138					Biological replicates
	SiControl	CAMBODIA	25	8.84932	0.00216815	0.00177342	1.22258							technical replicates	siControl	siControl	siControl	siFMR1	siFMR1	siFMR1	siControl	siControl	siControl	siFMR1	siFMR1	siFMR1
	SiControl	CAMBODIA	25.2982	9.32195	0.00156247	0.00177342	0.881053							No NITD	23.4279	23.0876	23.3087	23.1134	23.0729	23.0421	15.5843	15.6521	15.7693	15.7189	15.6634	15.5766
	siFMR1	CAMBODIA	24.7307	8.85538	0.00215906	0.00177342	1.21746	1.29354	0.120769	0.0697263					23.2255	22.9531	23.2368	22.9833	22.9396	22.8695	15.5237	15.612	15.7336	15.6115	15.6343	15.5694
	siFMR1	CAMBODIA	24.4164	8.62042	0.00254094	0.00177342	1.43279								23.276	22.9953	23.2489	23.0739	22.941	22.8241	15.4797	15.5447	15.7576	15.5532	15.6151	15.5485
	siFMR1	CAMBODIA	24.565	8.84017	0.00218195	0.00177342	1.23037							NITD	22.9662	22.9552	22.9618	22.9399	23.1179	23.2866	15.4724	15.3792	15.6093	15.5415	15.6544	15.6517
	SiControl	GAPDH	15.9514												22.9967	22.9484	23.1263	22.9463	23.2335	23.3205	15.5203	15.3403	15.642	15.5047	15.5887	15.5862
	SiControl	GAPDH	16.1507												22.9468	22.8675	23.1279	23.0032	23.1662	23.4164	15.4329	15.4124	15.7082	15.5429	15.6314	15.6791
	SiControl	GAPDH	15.9762											average technical replicates
	siFMR1	GAPDH	15.8754											no nitd	23.3098	23.012	23.2648	23.0569	22.9845	22.9119	15.5292	15.603	15.7535	15.6279	15.6376	15.5648
	siFMR1	GAPDH	15.796											plus nitd	22.9699	22.9237	23.072	22.9631	23.1725	23.3412	15.4752	15.3773	15.6532	15.5297	15.6248	15.639
	siFMR1	GAPDH	15.7249
NITD	SiControl	CAMBODIA	22.3497	6.38092	0.0119992	0.00775687	1.54691	1	0.646703	0.373374				normalized GAPDH (delta CT)	siControl	siControl	siControl	siFMR1	siFMR1	siFMR1
	SiControl	CAMBODIA	22.754	6.78766	0.00905131	0.00775687	1.16688							no nitd	7.78059	7.40906	7.51128	7.42898	7.34692	7.34704
	SiControl	CAMBODIA	24.7719	8.81514	0.00222012	0.00775687	0.286214							plus nitd	7.49472	7.54639	7.41886	7.43344	7.54775	7.70219
	siFMR1	CAMBODIA	23.4995	7.51063	0.00548373	0.00775687	0.706952	1.05156	0.300308	0.173383				2^-deltaCT	siControl	siControl	siControl	siFMR1	siFMR1	siFMR1
	siFMR1	CAMBODIA	22.5603	6.67996	0.00975283	0.00775687	1.25731							no nitd	0.00454789	0.00588371	0.00548125	0.00580301	0.00614268	0.00614214
	siFMR1	CAMBODIA	23.1383	6.75885	0.00923389	0.00775687	1.19041							plus nitd	0.00554453	0.00534945	0.00584389	0.00578512	0.00534444	0.00480187
	SiControl	GAPDH	15.9688
	SiControl	GAPDH	15.9663				no nitd		plus nitd
	SiControl	GAPDH	15.9568			Exp1	siControl	siFMR1	siControl	siFMR1				Exp 2	no nitd		plus nitd
	siFMR1	GAPDH	15.9889			Replicate 1	0.896363	1.21746	1.54691	0.706952				biological replicates	siControl	siFMR1	siControl	siFMR1
	siFMR1	GAPDH	15.8803			Replicate 2	1.22258	1.43279	1.16688	1.25731				Replicate 1	0.00454789	0.00580301	0.00554453	0.00578512
	siFMR1	GAPDH	16.3794			Replicate 3	0.881053	1.23037	0.286214	1.19041				Replicate 2	0.00588371	0.00614268	0.00534945	0.00534444
						Average	1	1.29354	1	1.05156				Replicate 3	0.00548125	0.00614214	0.00584389	0.00480187
						SD	0.192915	0.120769	0.646703	0.300308				Average	0.00530428	0.00602928	0.00557929	0.00531047
						SE	0.11138	0.0697263	0.373374	0.173383				Normalized vs sicontrol	no nitd		plus nitd
														Replicate 1	siControl	siFMR1	siControl	siFMR1
							no nitd		plus nitd					Replicate 2	0.8574	1.09402	0.993771	1.03689
							siControl	siFMR1	siControl	siFMR1				Replicate 3	1.10924	1.15806	0.958804	0.957906
					EXP1	Replicate 1	0.896363	1.21746	1.54691	0.706952				Average	1.03336	1.15796	1.04743	0.86066
						Replicate 2	1.22258	1.43279	1.16688	1.25731				SD	1	1.13668	1	0.951819
						Replicate 3	0.881053	1.23037	0.286214	1.19041				SE	0.129191	0.0369422	0.0446379	0.0882736
					EXP2	Replicate 1	0.8574	1.09402	0.993771	1.03689
						Replicate 2	1.10924	1.15806	0.958804	0.957906
						Replicate 3	1.03336	1.15796	1.04743	0.86066
						Average	1	1.21511	1	1.00169
						SD	0.146842	0.117309	0.409984	0.205366
						SE	0.0599481	0.0478913	0.167375	0.0838405
