# Supplementary material for: Fragile X mental retardation protein is a Zika virus restriction factor that is antagonized by subgenomic flaviviral RNA
Source: eLife. 2018 Dec 4;7:e39023. doi: 10.7554/eLife.39023 (PMC6279352; doi:10.7554/eLife.39023)
Supplement: Figure 5—source data 1. [file elife-39023-fig5-data1.xlsx]

## Sheet: Panel C and D
Figure 5 panel C- Mean fluorescence intensity of envelope protein measured by flow cytometry
																													Panel D
	Exp1	percentage of infection						Exp1	percentage of infection Normalized vs each siControl						Exp2	percentage of infection						Exp2	percentage of infection Normalized vs each siControl						Exp3	percentage of infection					Exp3	percentage of infection Normalized vs each siControl							exp4	percentage of infection					exp4
			WT ZIKV		Δ10 ZIKV					WT ZIKV		Δ10 ZIKV					WT ZIKV		Δ10 ZIKV					WT ZIKV		Δ10 ZIKV					WT ZIKV		Δ10 ZIKV				WT ZIKV		Δ10 ZIKV						WT ZIKV		Δ10 ZIKV
		NI	siControl	siFMR1	siControl	siFMR1			NI	siControl	siFMR1	siControl	siFMR1			NI	siControl	siFMR1	siControl	siFMR1			ni	siControl	siFMR1	siControl	siFMR1			NI	siControl	siFMR1	siControl	siFMR1		ni	siControl	siFMR1	siControl	siFMR1				NI	siControl	siFMR1	siControl	siFMR1
	Replicate 1	0.46	6.78	19.9	5.22	34.6		Replicate 1	0.0735608	1.08422	3.1823	0.756156	5.01207		Replicate 1	0.28	6.09	19.5	5.14	36		Replicate 1	0.0486393	1.0579	3.38738	0.951852	6.66667		Replicate 1	0.95	20	69.2	11.8	58.1	Replicate 1	0.038358	0.807537	2.79408	1.02907	5.06686			Replicate 1	0.49	36.3	71.7	22.6	50	Replicate 1
	Replicate 2	0.35	6.4	17.7	9.66	27		Replicate 2	0.0559701	1.02345	2.83049	1.39932	3.91115		Replicate 2	0.32	6.36	18.9	5.11	36.1		Replicate 2	0.0555877	1.10481	3.28315	0.946296	6.68519		Replicate 2	0.43	25.5	59	11.3	42.9	Replicate 2	0.017362	1.02961	2.38223	0.985465	3.74128			Replicate 2	0.31	40.6	69.8	32.4	50.7	Replicate 2
	Replicate 3		5.58	23.2	5.83	18.5		Replicate 3		0.892324	3.71002	0.84452	2.67986		Replicate 3		4.82	22.6	5.95	26.3		Replicate 3		0.83729	3.92588	1.10185	4.87037		Replicate 3		28.8	71.5	11.3	67.9	Replicate 3		1.16285	2.88694	0.985465	5.92151			Replicate 3		40	67.6	18.8	53.4	Replicate 3
	Average	0.405	6.25333	20.2667	6.90333	26.7		Average	0.0647655	1	3.24094	1	3.8677		Average	0.3	5.75667	20.3333	5.4	32.8		Average	0.0521135	1	3.53214	1	6.07407		Average	0.69	24.7667	66.5667	11.4667	56.3	Average	0.02786	1	2.68775	1	4.90988			Average	0.4	38.9667	69.7	24.6	51.3667	Average
	SD	0.0777817	0.613297	2.76827	2.40675	8.05419		SD	0.0124384	0.0980752	0.442688	0.348636	1.16671		SD	0.0282843	0.822334	1.98578	0.47655	5.62939		SD	0.00491331	0.142849	0.344954	0.08825	1.04248		SD	0.367696	4.4456	6.65307	0.288675	12.5968	SD	0.0148464	0.179499	0.26863	0.0251752	1.09856			SD	0.127279	2.32881	2.05183	7.01712	1.79536	SD
	SE	0.0449073	0.354087	1.59826	1.38954	4.65009		SE	0.00718134	0.0566238	0.255586	0.201285	0.673601		SE	0.0163299	0.474775	1.14649	0.275136	3.25013		SE	0.0028367	0.0824739	0.199159	0.0509512	0.601876		SE	0.212289	2.56667	3.84115	0.166667	7.27278	SE	0.00857157	0.103634	0.155094	0.0145349	0.634254			SE	0.0734847	1.34454	1.18462	4.05134	1.03655	SE
																													p value			0.0004		0.001
																													p value		siControl WT vs siControl Δ10 ZIKV			0.003
Figure 5 panel D																															siFMR1 WT vs siFMR1 Δ10 ZIKV			0.149779
normalized vs siControl each condition			WT ZIKV		Δ10 ZIKV
		NI	siControl	siFMR1	siControl	siFMR1
EXP1	Replicate 1	0.0735608	1.08422	3.1823	0.756156	5.01207
	Replicate 2	0.0559701	1.02345	2.83049	1.39932	3.91115
	Replicate 3		0.892324	3.71002	0.84452	2.67986
EXP2	Replicate 1	0.0486393	1.0579	3.38738	0.951852	6.66667
	Replicate 2	0.0555877	1.10481	3.28315	0.946296	6.68519
	Replicate 3		0.83729	3.92588	1.10185	4.87037
EXP3	Replicate 1	0.038358	0.807537	2.79408	1.02907	5.06686
	Replicate 2	0.017362	1.02961	2.38223	0.985465	3.74128
	Replicate 3		1.16285	2.88694	0.985465	5.92151
EXP4	Replicate 1	0.0125749	0.931565	1.84003	0.918699	2.03252
	Replicate 2	0.00795552	1.04192	1.79127	1.31707	2.06098
	Replicate 3		1.02652	1.73482	0.764228	2.17073
	Average	0.038751	1	2.81238	1	4.23493
	SD	0.0223066	0.104735	0.711527	0.187677	1.65997
	SE	0.00743553	0.0349116	0.237176	0.0625589	0.553322
	p value			2.75666e-06		2.64834e-05
[truncated: 5 more columns]

## Sheet: Panel F and G
	Figure 5 panel F and G-WB densitometry
	EXP1	ns2b densitometry normalized vs actin				EXP1	ns4b densitometry normalized vs actin					EXP2	ns2b densitometry normalized vs actin				EXP2	ns4b densitometry normalized vs actin
		WT ZIKV		Δ10 ZIKV			WT ZIKV		Δ10 ZIKV				WT ZIKV		Δ10 ZIKV			WT ZIKV		Δ10 ZIKV
		siControl	siFMR1	siControl	siFMR1		siControl	siFMR1	siControl	siFMR1			siControl	siFMR1	siControl	siFMR1		siControl	siFMR1	siControl	siFMR1
	replicate 1	0.795534	1.94045	0.18598	1.68355	replicate 1	0.535949	1.82475	0.207684	1.69227		replicate 1	0.29573	1.15713	0.130234	1.12184	replicate 1	0.412431	0.877715	0.220122	0.808277
	replicate 2	0.570914	1.60722	0.272422	1.14689	replicate 2	0.602402	1.54533	0.361628	1.18371		replicate 2	0.272568	1.08689	0.195003	0.928296	replicate 2	0.443383	0.794651	0.228151	0.68546
	replicate 3	0.528679	1.50261	0.250853	1.20742	replicate 3	0.58314	1.51499	0.344924	1.27644		replicate 3	0.316009	1.25574	0.0785885	1.32848	replicate 3	0.370298	0.815539	0.163231	1.19637
	average	0.631709	1.68343	0.236418	1.34596	average	0.57383	1.62836	0.304745	1.38414		average	0.294769	1.16659	0.134609	1.1262	average	0.408704	0.829302	0.203834	0.896702
	SD	0.143439	0.228654	0.0449925	0.29393	SD	0.0341903	0.170757	0.0844716	0.270845		SD	0.0217366	0.0848236	0.0583302	0.200129	SD	0.0366849	0.0432084	0.0353924	0.266685
	SE	0.0828148	0.132013	0.0259765	0.169701	SE	0.0197398	0.0985864	0.0487697	0.156372		SE	0.0125497	0.0489729	0.033677	0.115544	SE	0.02118	0.0249464	0.0204338	0.153971
Figure 5 panel F		ns2b densitometry normalized vs actin				Figure 5 panel G	ns4b densitometry normalized vs actin
		WT ZIKV		Δ10 ZIKV			WT ZIKV		Δ10 ZIKV
		siControl	siFMR1	siControl	siFMR1		siControl	siFMR1	siControl	siFMR1
EXP1	replicate 1	0.795534	1.94045	0.18598	1.68355	replicate 1	0.535949	1.82475	0.207684	1.69227
	replicate 2	0.570914	1.60722	0.272422	1.14689	replicate 2	0.602402	1.54533	0.361628	1.18371
	replicate 3	0.528679	1.50261	0.250853	1.20742	replicate 3	0.58314	1.51499	0.344924	1.27644
EXP2	replicate 1	0.29573	1.15713	0.130234	1.12184	replicate 1	0.412431	0.877715	0.220122	0.808277
	replicate 2	0.272568	1.08689	0.195003	0.928296	replicate 2	0.443383	0.794651	0.228151	0.68546
	replicate 3	0.316009	1.25574	0.0785885	1.32848	replicate 3	0.370298	0.815539	0.163231	1.19637
	average	0.463239	1.42501	0.185513	1.23608	average	0.491267	1.22883	0.25429	1.14042
	SD	0.206101	0.322379	0.0726654	0.25508	SD	0.0958431	0.451615	0.0800632	0.359264
	SE	0.0841403	0.131611	0.0296655	0.104136	SE	0.0391278	0.184371	0.0326857	0.146669
	p value		5.36671e-05		1.04761e-06			0.00144894		0.009
	p value	siControl WT vs siControl Δ10 ZIKV			0.00550283		siControl WT vs siControl Δ10 ZIKV			0.000455334
	p value	siFMR1 WT vs siFMR1 Δ10 ZIKV			0.143285		siFMR1 WT vs siFMR1 Δ10 ZIKV			0.357656

## Sheet: EXP1 for Panel F and G
	EXP1: densitometry values NS2B and NS4B									ns2b densitometry normalized vs actin					ns4b densitometry normalized vs actin
										WT ZIKV		Δ10 ZIKV			WT ZIKV		Δ10 ZIKV
			ns2b	ns4b	actin	ns2b/actin	ns4b/actin			sicontrol	siFMR1	siControl	siFMR1		siControl	siFMR1	siControl	siFMR1
siControl	WT ZIKV	1	6.163	4.152	7.747	0.795534	0.535949		Replicate 1	0.795534	1.94045	0.18598	1.68355	Replicate 1	0.535949	1.82475	0.207684	1.69227
	WT ZIKV	2	4.279	4.515	7.495	0.570914	0.602402		Replicate 2	0.570914	1.60722	0.272422	1.14689	Replicate 2	0.602402	1.54533	0.361628	1.18371
	WT ZIKV	3	3.65	4.026	6.904	0.528679	0.58314		Replicate 3	0.528679	1.50261	0.250853	1.20742	Replicate 3	0.58314	1.51499	0.344924	1.27644
siFMR1	WT ZIKV	4	13.752	12.932	7.087	1.94045	1.82475		Average	0.631709	1.68343	0.236418	1.34596	Average	0.57383	1.62836	0.304745	1.38414
	WT ZIKV	5	15.14	14.557	9.42	1.60722	1.54533		SD	0.143439	0.228654	0.0449925	0.29393	SD	0.0341903	0.170757	0.0844716	0.270845
	WT ZIKV	6	15.537	15.665	10.34	1.50261	1.51499		SE	0.0828148	0.132013	0.0259765	0.169701	SE	0.0197398	0.0985864	0.0487697	0.156372
siControl	Δ10 ZIKV	7	1.491	1.665	8.017	0.18598	0.207684
	Δ10 ZIKV	8	2.269	3.012	8.329	0.272422	0.361628
	Δ10 ZIKV	9	1.984	2.728	7.909	0.250853	0.344924
siFMR1	Δ10 ZIKV	10	14.29	14.364	8.488	1.68355	1.69227
	Δ10 ZIKV	11	11.493	11.862	10.021	1.14689	1.18371
	Δ10 ZIKV	12	9.954	10.523	8.244	1.20742	1.27644

## Sheet: EXP2 for panel F and G
EXP2: densitometry values NS2B and NS4B
			ns2b	ns4b	actin	ns2b/actin	ns4b/actin
siControl	WT ZIKV	1	1813.58	2529.26	6132.55	0.29573	0.412431
	WT ZIKV	2	1798.87	2926.2	6599.72	0.272568	0.443383
	WT ZIKV	3	2083.99	2442.01	6594.72	0.316009	0.370298
siFMR1	WT ZIKV	4	7488.13	5679.96	6471.31	1.15713	0.877715
	WT ZIKV	5	6881.31	5031.08	6331.18	1.08689	0.794651
	WT ZIKV	6	8097.43	5258.84	6448.31	1.25574	0.815539
siControl	Δ10 ZIKV	7	732.799	1238.58	5626.77	0.130234	0.220122
	Δ10 ZIKV	8	1253.46	1466.53	6427.89	0.195003	0.228151
	Δ10 ZIKV	9	516.799	1073.41	6576.01	0.0785885	0.163231
siFMR1	Δ10 ZIKV	10	7947.43	5726.08	7084.31	1.12184	0.808277
	Δ10 ZIKV	11	6918.6	5108.74	7453.01	0.928296	0.68546
	Δ10 ZIKV	12	8942.96	8053.61	6731.72	1.32848	1.19637
			ns2b densitometry normalized vs actin							ns4b densitometry normalized vs actin								0.695546
		ns2b	WT ZIKV		Δ10 ZIKV				ns4b	WT ZIKV		Δ10 ZIKV						0.747681
			sicontrol	siFMR1	siControl	siFMR1				sicontrol	siFMR1	siControl	siFMR1					0.624539
		Replicate 1	0.29573	1.15713	0.130234	1.12184			Replicate 1	0.412431	0.877715	0.220122	0.808277					1.48023
		Replicate 2	0.272568	1.08689	0.195003	0.928296			Replicate 2	0.443383	0.794651	0.228151	0.68546					1.34011
		Replicate 3	0.316009	1.25574	0.0785885	1.32848			Replicate 3	0.370298	0.815539	0.163231	1.19637					1.37532
		Average	0.294769	1.16659	0.134609	1.1262			Average	0.408704	0.829302	0.203834	0.896702					0.371269
		SD	0.0217366	0.0848236	0.0583302	0.200129			SD	0.0366849	0.0432084	0.0353924	0.266685					0.384691
		SE	0.0125497	0.0489729	0.033677	0.115544			SE	0.02118	0.0249464	0.0204338	0.153971					0.275331
																		1.36313
																		1.15594
																		2.0176
