# Supplementary material for: Fragile X mental retardation protein is a Zika virus restriction factor that is antagonized by subgenomic flaviviral RNA
Source: eLife. 2018 Dec 4;7:e39023. doi: 10.7554/eLife.39023 (PMC6279352; doi:10.7554/eLife.39023)
Supplement: Figure 6—source data 1. [file elife-39023-fig6-data1.xlsx]

## Sheet: Panel B
Figure 6 panel B-FXR2 densitometry from WB
		Densitometry			FXR2/GAPDH				Normalized vs Non-Infected NI
		fxr2	gapdh		NI	WT ZIKV	Δ10 ZIKV			NI	WT ZIKV	Δ10 ZIKV
NI	1	5.223	10.533	Biological replicate 1	0.49587	1.73989	0.82191		Biological replicate 1	0.820154	2.87772	1.35941
NI	2	8.113	9.589	Biological replicate 2	0.846074	1.58054	1.48161		Biological replicate 2	1.39938	2.61416	2.45054
NI	3	6.627	9.509	Biological replicate 3	0.696919	1.69756	0.890326		Biological replicate 3	1.15268	2.80771	1.47257
NI	4	2.849	7.506	Biological replicate 4	0.379563	1.57569	0.400043		Biological replicate 4	0.627785	2.60615	0.661659
WT ZIKV	5	11.786	6.774	average	0.604606	1.64842	0.898473		average	1	2.72643	1.48605
WT ZIKV	6	10.264	6.494	SD	0.207602	0.0830235	0.445126		SD	0.343368	0.137318	0.736224
WT ZIKV	7	11.484	6.765	SE	0.103801	0.0415118	0.222563		SE	0.171684	0.0686592	0.368112
WT ZIKV	8	11.033	7.002						p value Non-infected vs WT ZIKV		0.00144046
Δ10 ZIKV	9	6.092	7.412						p value WT ZIKV vs Δ10 ZIKV			0.0080775
Δ10 ZIKV	10	14.382	9.707						p value NI vs Δ10 ZIKV			0.138293
Δ10 ZIKV	11	8.467	9.51
Δ10 ZIKV	12	3.68	9.199

## Sheet: Panel D
Figure 6 Panel D-FXR2 Mean fluorescence intensity in Non infected, WT and Mutant ZIKV infected cells
EXP1					EXP2					EXP3						FXR2 mean Fluorescence Intensity
FXR2 mean Fluorescence Intensity					FXR2 mean Fluorescence Intensity					FXR2 mean Fluorescence Intensity						Alexa 647 signal	Non-infected	WT ZIKV	Δ10 ZIKV
Alexa 647 signal	Non-infected	WT ZIKV	Δ10 ZIKV		Alexa 647 signal	Non-infected	WT ZIKV	Δ10 ZIKV		Alexa 647 signal	Non-infected	WT ZIKV	Δ10 ZIKV		EXP1	Biological replicate 1	434	1062	867
Biological replicate 1	434	1062	867		Biological replicate 1	870	1433	1580		Biological replicate 1	1175	1564	1316			Biological replicate 2	513	972	806
Biological replicate 2	513	972	806		Biological replicate 2	820	1487	1225		Biological replicate 2	1110	1520	1327			Biological replicate 3	464	1011	845
Biological replicate 3	464	1011	845		Biological replicate 3	702	1518	1354		Biological replicate 3	1050	1504	1396			Biological replicate 4	656	1443	856
Biological replicate 4	656	1443	856		Biological replicate 4	869	1474	1247		Average	1111.67	1529.33	1346.33		EXP2	Biological replicate 1	870	1433	1580
Average	516.75	1122	843.5		Average	815.25	1478	1351.5		SD	62.5167	31.0698	43.3628			Biological replicate 2	820	1487	1225
SD	98.3781	217.15	26.5644		SD	79.0248	35.2231	162.42		SE	36.094	17.9382	25.0355			Biological replicate 3	702	1518	1354
SE	49.189	108.575	13.2822		SE	39.5124	17.6115	81.2101								Biological replicate 4	869	1474	1247
p value Non-infected vs WT ZIKV		0.00113534													EXP3	Biological replicate 1	1175	1564	1316
p value WT ZIKV vs Δ10 ZIKV			0.029													Biological replicate 2	1110	1520	1327
p value NI vs Δ10 ZIKV			0.000339131													Biological replicate 3	1050	1504	1396
																average	787.545	1362.55	1165.36
																SD	258.291	227.01	271.338
EXP1					EXP2					EXP3						SE	77.8776	68.4462	81.8113
Percentage of infection					Percentage of infection					Percentage of infection						variance		0.69091	0.879219
Green Fluorescence signal	Non-infected	WT ZIKV	Δ10 ZIKV		Green Fluorescence signal	Non-infected	WT ZIKV	Δ10 ZIKV		Green Fluorescence signal	Non-infected	WT ZIKV	Δ10 ZIKV			t test		1.05262e-05	0.00161669
Biological replicate 1	0.03	74.9	81.3		Biological replicate 1	0.042	88.1	89.2		Biological replicate 1	0.35	88.7	92.4			variance			0.583187
Biological replicate 2	0.06	73.7	81.5		Biological replicate 2	0	86.2	88.4		Biological replicate 2	0.081	83.8	91.5			t test			0.0399127
Biological replicate 3	0.02	74.9	84.3		Biological replicate 3	0	89.3	89.5		Biological replicate 3	0.2	86.5	90.3
Biological replicate 4	0.01	74.7	81		Biological replicate 4	0	87.8	91		Average	0.210333	86.3333	91.4
Average	0.03	74.55	82.025		Average	0.0105	87.85	89.525		SD	0.134797	2.45425	1.05357
SD	0.0216025	0.574456	1.53052		SD	0.021	1.27671	1.08743		SE	0.0778253	1.41696	0.608276
