# Supplementary material for: Fragile X mental retardation protein is a Zika virus restriction factor that is antagonized by subgenomic flaviviral RNA
Source: eLife. 2018 Dec 4;7:e39023. doi: 10.7554/eLife.39023 (PMC6279352; doi:10.7554/eLife.39023)
Supplement: Figure 7—source data 1. [file elife-39023-fig7-data1.xlsx]

## Sheet: Panel C 5' tri-phosphate RNA
Figure 7 panel C-sfRNA transfection and FMRP targets Mean Fluorescence Intensity
Flow cytometry
transfection of 5' triphosphate RNA
EXP 1	background	FXR2 MFI		BRD4 MFI
	Secondary Control	DBSLIII	sfRNA	DBSLIII	sfRNA
Replicate 1	297	963	1338	4047	5035
Replicate 2	228	958	1322	3997	5011
Replicate 3	289	966	1305	4015	5005		Normalized vs DBSLIII						Normalized vs DBSLIII
average	271.333	962.333	1321.67	4019.67	5017
		FXR2 MFI		BRD4 MFI			FXR2 MFI		BRD4 MFI				FXR2 MFI		BRD4 MFI
		DBSLIII	sfRNA	DBSLIII	sfRNA		DBSLIII	sfRNA	DBSLIII	sfRNA			DBSLIII	sfRNA	DBSLIII	sfRNA
Substracted Background	Replicate 1	691.667	1066.67	3775.67	4763.67	Replicate 1	1.00096	1.54366	1.00729	1.27088	EXP1	Replicate 1	1.00096	1.54366	1.00729	1.27088
	Replicate 2	686.667	1050.67	3725.67	4739.67	Replicate 2	0.993729	1.5205	0.993953	1.26447		Replicate 2	0.993729	1.5205	0.993953	1.26447
	Replicate 3	694.667	1033.67	3743.67	4733.67	Replicate 3	1.00531	1.4959	0.998755	1.26287		Replicate 3	1.00531	1.4959	0.998755	1.26287
	average	691	1050.33	3748.33	4745.67	average	1	1.52002	1	1.26607	EXP2	Replicate 1	1.00768	1.28766	1.00258	1.02995
	SD	4.04145	16.5025	25.3246	15.8745	SD	0.0058487	0.0238821	0.00675622	0.00423508		Replicate 2	1.00591	1.27112	1.00379	1.02801
												Replicate 3	0.986415	1.28234	0.993623	1.02317
											EXP3	Replicate 1	0.954887	1.84023	0.997804	1.16912
												Replicate 2	1.00564	1.71617	1.00307	1.1935
												Replicate 3	1.03947	1.83459	0.999121	1.17966
	background	FXR2 MFI		BRD4 MFI							EXP4	Replicate 1	1.00187	1.49298	0.943484	1.55824
EXP 2	Secondary Control	DBSLIII	sfRNA	DBSLIII	sfRNA							Replicate 2	0.987839	1.46773	1.0246	1.60033
Replicate 1	406	2098	2572	4532	4645							Replicate 3	1.01029	1.39196	1.03192	1.57837
Replicate 2	406	2095	2544	4537	4637							Average	1	1.51207	1	1.26321
Replicate 3	364	2062	2563	4495	4617							SD	0.0196081	0.198321	0.0212899	0.210653
Average	392	2085	2559.67	4521.33	4633		Normalized vs DBSLIII					p value		1.21515e-06		0.000604743
		FXR2 MFI		BRD4 MFI			FXR2 MFI		BRD4 MFI
		DBSLIII	sfRNA	DBSLIII	sfRNA		DBSLIII	sfRNA	DBSLIII	sfRNA
Substracted Background	Replicate 1	1706	2180	4140	4253	Replicate 1	1.00768	1.28766	1.00258	1.02995
	Replicate 2	1703	2152	4145	4245	Replicate 2	1.00591	1.27112	1.00379	1.02801
	Replicate 3	1670	2171	4103	4225	Replicate 3	0.986415	1.28234	0.993623	1.02317
	average	1693	2167.67	4129.33	4241	average	1	1.28037	1	1.02704
	SD	19.975	14.2945	22.942	14.4222	SD	0.0117986	0.00844331	0.00555585	0.00349262
EXP 3	background	FXR2 MFI		BRD4 MFI
	Secondary Control	DBSLIII	sfRNA	DBSLIII	sfRNA
Replicate 1	171	370	527	1715	1975
Replicate 2	203	379	505	1723	2012		Normalized vs DBSLIII
Replicate 3	228	385	526	1717	1991
Average	200.667	378	519.333	1718.33	1992.67		FXR2 MFI		BRD4 MFI
							DBSLIII	sfRNA	DBSLIII	sfRNA
Substracted Background	Replicate 1	169.333	326.333	1514.33	1774.33	Replicate 1	0.954887	1.84023	0.997804	1.16912
	Replicate 2	178.333	304.333	1522.33	1811.33	Replicate 2	1.00564	1.71617	1.00307	1.1935
	Replicate 3	184.333	325.333	1516.33	1790.33	Replicate 3	1.03947	1.83459	0.999121	1.17966
	average	177.333	318.667	1517.67	1792	average	1	1.79699	1	1.18076
	SD	7.54983	12.4231	4.16333	18.5562	SD	0.0425743	0.0700551	0.00274325	0.0122268
							Normalized vs DBSLIII
EXP 4	background	FXR2 MFI		BRD4 MFI			FXR2 MFI		BRD4 MFI
	Secondary Control	DBSLIII	sfRNA	DBSLIII	sfRNA		DBSLIII	sfRNA	DBSLIII	sfRNA
Replicate 1	323	357	532	1547	2555	Replicate 1	1.00187	1.49298	0.943484	1.55824
Replicate 2	272	352	523	1680	2624	Replicate 2	0.987839	1.46773	1.0246	1.60033
Replicate 3		360	496	1692	2588	Replicate 3	1.01029	1.39196	1.03192	1.57837
Average	297.5	356.333	517	1639.67	2589	average	1	1.45089	1	1.57898
SD	36.0624	4.04145	18.735	80.4757	34.5109	SD	0.0113418	0.0525772	0.0490805	0.0210475

## Sheet: Panel F 5' monophosphate RNA
Figure 7 panel F-sfRNA transfection and FMRP targets Mean Fluorescence Intensity
flow cytometry
Decapped RNA-5' monophosphate RNA		background	FXR2 MFI		BRD4 MFI
	Exp 1	Secondary Control	DBSLIII	sfRNA	DBSLIII	sfRNA
	Replicate 1	163	1345	1533	9754	10691
	Replicate 2	161	1345	1557	9780	10793
	Replicate 3	185	1319	1556	9654	10565
	Average	169.667	1336.33	1548.67	9729.33	10683
background substracted			FXR2 MFI		BRD4 MFI
			DBSLIII	sfRNA	DBSLIII	sfRNA
		Replicate 1	1175.33	1363.33	9584.33	10521.3
		Replicate 2	1175.33	1387.33	9610.33	10623.3
		Replicate 3	1149.33	1386.33	9484.33	10395.3
		Average	1166.67	1379	9559.67	10513.3
		SD	15.0111	13.5769	66.5232	114.21
		background	FXR2 MFI		BRD4 MFI
	Exp 2	Secondary Control	DBSLIII	sfRNA	DBSLIII	sfRNA
	Replicate 1	176	1192	1351	6548	7209
	Replicate 2	165	1207	1331	6411	7147
	Replicate 3	173	1186	1342	6308	7101
	Average	171.333	1195	1341.33	6422.33	7152.33
background substracted			FXR2 MFI		BRD4 MFI
			DBSLIII	sfRNA	DBSLIII	sfRNA
		Replicate 1	1020.67	1179.67	6376.67	7037.67
		Replicate 2	1035.67	1159.67	6239.67	6975.67
		Replicate 3	1014.67	1170.67	6136.67	6929.67
		Average	1023.67	1170	6251	6981
		SD	10.8167	10.0167	120.401	54.1972
						Normalized FXR2 MFI vs DBSLIII						Normalized BRD4 MFI vs DBSLIII
			FXR2 MFI			FXR2 MFI			BRD4 MFI			BRD4 MFI
			DBSLIII	sfRNA		DBSLIII	sfRNA		DBSLIII	sfRNA		DBSLIII	sfRNA
	exp1	Replicate 1	1175.33	1363.33	Replicate 1	1.00743	1.16857	Replicate 1	9584.33	10521.3	Replicate 1	1.00258	1.1006
		Replicate 2	1175.33	1387.33	Replicate 2	1.00743	1.18914	Replicate 2	9610.33	10623.3	Replicate 2	1.0053	1.11127
		Replicate 3	1149.33	1386.33	Replicate 3	0.985143	1.18829	Replicate 3	9484.33	10395.3	Replicate 3	0.99212	1.08742
		Average	1166.67	1379	Replicate 1	0.997069	1.15239	Average	9559.67	10513.3	Replicate 1	1.0201	1.12585
	exp2	Replicate 1	1020.67	1179.67	Replicate 2	1.01172	1.13286	Replicate 1	6376.67	7037.67	Replicate 2	0.998187	1.11593
		Replicate 2	1035.67	1159.67	Replicate 3	0.991208	1.1436	Replicate 2	6239.67	6975.67	Replicate 3	0.98171	1.10857
		Replicate 3	1014.67	1170.67				Replicate 3	6136.67	6929.67
		Average	1023.67	1170				Average	6251	6981
					Normalized		FXR2 MFI		BRD4 MFI
							DBSLIII	sfRNA	DBSLIII	sfRNA
					exp1	Replicate 1	1.00743	1.16857	1.00258	1.1006
						Replicate 2	1.00743	1.18914	1.0053	1.11127
						Replicate 3	0.985143	1.18829	0.99212	1.08742
					exp2	Replicate 1	0.997069	1.15239	1.0201	1.12585
						Replicate 2	1.01172	1.13286	0.998187	1.11593
						Replicate 3	0.991208	1.1436	0.98171	1.10857
						Average	1	1.16248	1	1.10827
						SD	0.01053	0.0234507	0.0129524	0.0131942
						p value		1.52124e-05		1.76372e-06
