# Supplementary material for: Fragile X mental retardation protein is a Zika virus restriction factor that is antagonized by subgenomic flaviviral RNA
Source: eLife. 2018 Dec 4;7:e39023. doi: 10.7554/eLife.39023 (PMC6279352; doi:10.7554/eLife.39023)
Supplement: Figure 8—source data 1. [file elife-39023-fig8-data1.xlsx]

## Sheet: Panel B
	Figure 8 panel B-qPCR for analyze viral infection in mice
		Non Infected			WT ZIKV				Δ10 ZIKV
	mouse ID	101	104	105	107	108	92	93	96	98	99
	# mouse	1	2	3	1	2	3	4	1	3	4
	CT ZIKV	37.02	undetected	undetected	22.39	23.86	19.85	22.22	27.37	29.24	28.33
	CT gapdh	15.69	15.3	15.5	15.13	14.84	15.19	15.06	15.17	15.26	15.36
	delta CT ZIKV/GAPDH	21.33	#VALUE!	#VALUE!	7.26	9.02	4.66	7.16	12.2	13.98	12.97
	delta delta CT	3.79341e-07	N/D	N/D	0.00652412	0.00192624	0.0395549	0.00699238	0.000212537	6.18872e-05	0.000124635
Mouse ID			Relative viral RNA	viral RNA x 1e106			NI	WT ZIKV	Δ10 ZIKV
101	Mouse 1	NI	3.79341e-07	0.379341		average	0	1374.94	13.302
104	Mouse 2	NI	N/D	#VALUE!		SD	0	1735.49	7.5674
105	Mouse 3	NI	N/D	#VALUE!		SE	0	1001.98	4.36904
107	Mouse 1	WT ZIKV	0.00652412	652.412
108	Mouse 2	WT ZIKV	0.00192624	192.624
92	Mouse 3	WT ZIKV	0.0395549	3955.49
93	Mouse 4	WT ZIKV	0.00699238	699.238
96	Mouse 1	Δ10 ZIKV	0.000212537	21.2537
98	Mouse 3	Δ10 ZIKV	6.18872e-05	6.18872
99	Mouse 4	Δ10 ZIKV	0.000124635	12.4635

## Sheet: Panel C and D
	Figure 8 panel C and D-FXR2 and PNPLA6 expression in infected mice
Mouse ID	FXR2 densitometry		FXR2 signal	GAPDH signal	FXR2/GAPDH						Mouse ID	PNPLA6 densitometry		PNPLA6 signal	GAPDH signal	PNPLA6/GAPDH
101	Mouse 1	NI	438	71400	0.00613445						101	Mouse 1	NI	413	106000	0.00389623
104	Mouse 2	NI	315	70700	0.00445545						104	Mouse 2	NI	293	97500	0.00300513
105	Mouse 3	NI	351	71200	0.00492978						105	Mouse 3	NI	521	107000	0.00486916
107	Mouse 1	WT ZIKV	704	76300	0.00922674						107	Mouse 1	WT ZIKV	739	94200	0.00784501
108	Mouse 2	WT ZIKV	635	66500	0.00954887						108	Mouse 2	WT ZIKV	1130	91800	0.0123094
92	Mouse 3	WT ZIKV	429	69300	0.00619048						92	Mouse 3	WT ZIKV	697	104000	0.00670192
93	Mouse 4	WT ZIKV	637	75800	0.00840369						93	Mouse 4	WT ZIKV	743	110000	0.00675455
96	Mouse 1	Δ10 ZIKV	427	81000	0.0052716						96	Mouse 1	Δ10 ZIKV	532	117000	0.00454701
97	Mouse 2	Δ10 ZIKV	Non quantified	Non quantified	Non quantified						97	Mouse 2	Δ10 ZIKV	Non quantified	Non quantified	Non quantified
98	Mouse 3	Δ10 ZIKV	725	81400	0.00890663						98	Mouse 3	Δ10 ZIKV	826	117000	0.00705983
99	Mouse 4	Δ10 ZIKV	591	84600	0.00698582						99	Mouse 4	Δ10 ZIKV	835	154000	0.00542208
						Normalized vs NI											Normalized vs NI
	FXR2	NI	WT ZIKV	Δ10 ZIKV		NI	WT ZIKV	Δ10 ZIKV				PNPLA6	NI	WT ZIKV	Δ10 ZIKV		NI	WT ZIKV	Δ10 ZIKV
	Mouse 1	0.00613445	0.00922674	0.0052716		1.18581	1.78356	1.01902				Mouse 1	0.00389623	0.00784501	0.00454701		0.993048	1.99949	1.15892
	Mouse 2	0.00445545	0.00954887			0.861251	1.84583					Mouse 2	0.00300513	0.0123094			0.76593	3.13734
	Mouse 3	0.00492978	0.00619048	0.00890663		0.95294	1.19664	1.72168				Mouse 3	0.00486916	0.00670192	0.00705983		1.24102	1.70815	1.79937
	Mouse 4		0.00840369	0.00698582			1.62446	1.35038				Mouse 4		0.00675455	0.00542208			1.72156	1.38195
	Average	0.00517322	0.00834244	0.00705468	Average	1	1.61262	1.36369				Average	0.0039235	0.00840271	0.00567631		1	2.14163	1.44674
	SD	0.000865574	0.00151351	0.00181849	SD	0.167318	0.292567	0.35152				SD	0.000932315	0.0026572	0.00127555		0.237623	0.677252	0.325106
	SE	0.000499739	0.000756756	0.00104991	SE	0.0966011	0.146283	0.20295				SE	0.000538272	0.0013286	0.000637777		0.137192	0.338626	0.162553
	p value NI vs WT ZIKV		0.011904									p value NI vs WT ZIKV		0.0182552				0.0182552
	p value WT vs Δ10 ZIKV			0.1886								p value WT vs Δ10 ZIKV			0.0734113				0.0696235
	p value NI vs Δ10 ZIKV			0.0522651								p value NI vs Δ10 ZIKV			0.0286448				0.0635232
