# Supplementary material for: Fragile X mental retardation protein is a Zika virus restriction factor that is antagonized by subgenomic flaviviral RNA
Source: eLife. 2018 Dec 4;7:e39023. doi: 10.7554/eLife.39023 (PMC6279352; doi:10.7554/eLife.39023)
Supplement: Table 1—﻿source data 1. [file elife-39023-fig1.xlsx]

## Sheet: Sheet1
			Normalized abundance			Ratio vs NS2A (%)		Ratio>2 for both 3' UTRs
Accession	Unique peptides	Confidence score	NS2A	PRVABC59 3'UTR	MR766 3' UTR	PRVABC59 3'UTR	MR766 3' UTR	Ratio>2 for PRVABC 3' UTR
sp|Q86U38|NOP9_HUMAN	1	60.76	0	6754.52	9540.75	#DIV/0!	#DIV/0!	Ratio>2 for MR766 3' UTR
sp|Q9UMN6|KMT2B_HUMAN	1	34.89	0	6237.13	14227	#DIV/0!	#DIV/0!
sp|O75461|E2F6_HUMAN	1	59.94	1259.47	109731	137975	87.1252	109.55
sp|P51116|FXR2_HUMAN	2	129.56	17734.4	607849	821627	34.2751	46.3295
sp|P51114|FXR1_HUMAN	12	897.83	615389	8.23035e+06	9.88929e+06	13.3742	16.07
sp|Q06787|FMR1_HUMAN	6	361.72	110093	1.35495e+06	1.65647e+06	12.3073	15.0461
sp|P15927|RFA2_HUMAN	2	165.79	34641.8	161851	132423	4.67213	3.82265
sp|Q6P2Q9|PRP8_HUMAN	1	45.56	16898.4	75900.6	128450	4.49159	7.6013
sp|P26196|DDX6_HUMAN	9	723.92	471097	1.99989e+06	3.91375e+06	4.24518	8.30772
sp|Q2M296|MTHSD_HUMAN	1	94.93	13517.7	55869	310282	4.13302	22.9537
sp|Q96QE5|TEFM_HUMAN	1	31.99	1043.16	4016.9	5180.72	3.85071	4.96638
sp|Q9UKN8|TF3C4_HUMAN	1	57.98	27054.8	93939.4	97806.3	3.47219	3.61511
sp|P48634|PRC2A_HUMAN	1	95.54	24363.7	84499.1	152905	3.46823	6.27592
sp|Q9Y520|PRC2C_HUMAN	4	217.97	38452.8	125254	180789	3.25736	4.70158
sp|Q8N0V3|RBFA_HUMAN	2	136.28	72780.9	162274	224854	2.22962	3.08946
sp|Q8TBF4|ZCRB1_HUMAN	3	157.36	232678	515712	216921	2.21641	0.932276
sp|Q5SY16|NOL9_HUMAN	2	106.3	69220.5	145999	111370	2.10919	1.60892
sp|Q14157|UBP2L_HUMAN	1	61.83	7251.21	14766.8	22365.7	2.03646	3.08441
sp|P08238|HS90B_HUMAN	1	48.85	11411.1	23032.1	4966.66	2.0184	0.43525
sp|P06748|NPM_HUMAN	5	623.91	5.52369e+06	1.1138e+07	1.60003e+07	2.0164	2.89666
sp|P14678|RSMB_HUMAN	1	30.53	200033	386875	287886	1.93406	1.43919
sp|Q03701|CEBPZ_HUMAN	1	62.61	29609.9	56672	73439.1	1.91395	2.48022
sp|O43719|HTSF1_HUMAN	3	152.24	10136	19245.6	19206.2	1.89874	1.89485
sp|P38646|GRP75_HUMAN	2	74.21	10124.2	18911.8	24381.4	1.86798	2.40823
sp|Q2QGD7|ZXDC_HUMAN	1	50.49	24273.4	44534.3	39069	1.8347	1.60954
sp|Q96F86|EDC3_HUMAN	7	390.64	1.29139e+06	2.21811e+06	3.16085e+06	1.71761	2.44763
sp|P09874|PARP1_HUMAN	2	101.8	57508.3	97874	43788.9	1.70191	0.761436
sp|P21333|FLNA_HUMAN	1	30.25	12093.6	20239.6	17933.9	1.67358	1.48292
sp|O43447|PPIH_HUMAN	2	67.96	21127.5	34980.6	47917.2	1.65569	2.268
sp|O43422|P52K_HUMAN	2	134.08	239656	387022	415604	1.6149	1.73417
sp|P49711|CTCF_HUMAN	8	475.57	1.72131e+06	2.75142e+06	3.51518e+06	1.59844	2.04215
sp|Q16531|DDB1_HUMAN	1	53.13	21007.4	33547.3	38234.6	1.59692	1.82005
sp|Q53T94|TAF1B_HUMAN	2	123.37	73228.7	114513	124583	1.56377	1.70128
sp|P0CG40|SP9_HUMAN	1	31.38	147397	223372	132065	1.51544	0.895981
sp|Q14690|RRP5_HUMAN	7	418.79	303805	457400	922567	1.50557	3.03671
sp|Q92572|AP3S1_HUMAN	1	64.1	27565.6	41361.1	59241.2	1.50046	2.14909
sp|Q8IVS2|FABD_HUMAN	4	251.94	968861	1.44797e+06	1.15592e+06	1.49451	1.19307
sp|Q6ZN55|ZN574_HUMAN	2	162.66	74447.6	111229	118248	1.49405	1.58833
sp|O14979|HNRDL_HUMAN	1	82.43	98421	143921	141491	1.4623	1.43761
sp|P06576|ATPB_HUMAN	1	51.52	27164.5	39422.4	49555.2	1.45125	1.82426
sp|Q9H5J8|TAF1D_HUMAN	1	59.09	39129.9	56735.1	44973.5	1.44992	1.14934
sp|P60228|EIF3E_HUMAN	6	377.22	211389	305241	318960	1.44398	1.50888
sp|Q9BQC6|RT63_HUMAN	1	116.09	682848	978143	1.09049e+06	1.43245	1.59697
sp|Q9NY61|AATF_HUMAN	4	210.07	341933	487346	637640	1.42527	1.86481
sp|P61964|WDR5_HUMAN	4	221.6	717172	1.02086e+06	1.02201e+06	1.42345	1.42506
sp|Q7L2H7|EIF3M_HUMAN	2	141.55	177542	250125	245685	1.40882	1.38381
sp|Q6NZY4|ZCHC8_HUMAN	1	85.66	21225.8	29834.5	16506.3	1.40558	0.777654
sp|Q15573|TAF1A_HUMAN	1	34.11	21168.7	29441.3	27894.2	1.39079	1.31771
sp|Q9BSC4|NOL10_HUMAN	6	414.12	456125	629807	703471	1.38078	1.54228
sp|Q9HC36|MRM3_HUMAN	2	102.34	150940	207213	269621	1.37282	1.78628
sp|O15047|SET1A_HUMAN	1	70.64	10213.6	14001	14330.7	1.37081	1.4031
sp|O15371|EIF3D_HUMAN	3	182.25	95955.4	131358	143655	1.36895	1.4971
sp|O43172|PRP4_HUMAN	7	404.06	370851	507163	621499	1.36757	1.67587
sp|Q13127|REST_HUMAN	1	55.84	4018.76	5493.02	3925.36	1.36684	0.976757
sp|O75818|RPP40_HUMAN	1	49.72	99336.4	133158	151648	1.34048	1.52661
sp|Q99575|POP1_HUMAN	3	183.08	79627	105888	94384.3	1.3298	1.18533
sp|Q8N9N2|ASCC1_HUMAN	1	34.69	66864.3	88787.8	81464.1	1.32788	1.21835
sp|Q16540|RM23_HUMAN	8	536.81	4.5436e+06	6.02617e+06	5.59869e+06	1.3263	1.23222
sp|Q14197|ICT1_HUMAN	5	335.59	1.78662e+06	2.35924e+06	2.32159e+06	1.32051	1.29943
sp|Q9H5H4|ZN768_HUMAN	1	32.22	10076.9	13301.3	7720.84	1.31997	0.766189
sp|O95059|RPP14_HUMAN	1	61.91	29709.3	39152.7	40142.2	1.31786	1.35116
sp|Q96EY4|TMA16_HUMAN	1	80.27	127800	168159	267756	1.31579	2.09511
sp|Q52LJ0|FA98B_HUMAN	1	47.45	122412	160531	127279	1.31139	1.03976
sp|O00203|AP3B1_HUMAN	5	241.51	74928.1	98203.5	128051	1.31064	1.70898
sp|Q86VM9|ZCH18_HUMAN	5	369.79	988361	1.29286e+06	1.51844e+06	1.30808	1.53632
sp|P62805|H4_HUMAN	2	105.04	451444	588614	696443	1.30385	1.5427
sp|Q9NZE8|RM35_HUMAN	1	36.58	425149	549615	523258	1.29276	1.23076
sp|Q13405|RM49_HUMAN	7	482.66	5.83758e+06	7.52429e+06	7.97303e+06	1.28894	1.36581
sp|Q9BQ48|RM34_HUMAN	1	54.18	632796	814752	759801	1.28754	1.2007
sp|P52815|RM12_HUMAN	7	582.41	1.17345e+07	1.50941e+07	1.64338e+07	1.2863	1.40047
sp|O95900|TRUB2_HUMAN	3	139.03	107059	137375	147496	1.28317	1.37771
sp|A4D1E9|GTPBA_HUMAN	7	458.04	1.10677e+06	1.42005e+06	1.38126e+06	1.28305	1.248
sp|Q9NYY8|FAKD2_HUMAN	1	89.15	94028.3	120636	104488	1.28298	1.11124
sp|O94992|HEXI1_HUMAN	3	216.74	202119	259225	215825	1.28253	1.06781
sp|Q96GC5|RM48_HUMAN	5	423.5	1.92601e+06	2.4598e+06	2.55694e+06	1.27715	1.32758
sp|Q9BYD3|RM04_HUMAN	11	1041.87	4.92767e+06	6.28862e+06	6.90852e+06	1.27619	1.40199
sp|Q9UQ35|SRRM2_HUMAN	10	702.63	851250	1.08412e+06	1.09147e+06	1.27357	1.2822
sp|Q96QV6|H2A1A_HUMAN	2	177.86	2.51273e+06	3.19002e+06	3.54027e+06	1.26954	1.40893
sp|Q9BV38|WDR18_HUMAN	2	88.24	62521	78761.3	51950.5	1.25976	0.830929
sp|Q9BYD1|RM13_HUMAN	8	703.54	4.50008e+06	5.66327e+06	5.48163e+06	1.25848	1.21812
sp|O00425|IF2B3_HUMAN	15	1556.47	1.88361e+07	2.36865e+07	3.37257e+07	1.25751	1.79049
sp|O43395|PRPF3_HUMAN	2	109.79	459870	578110	675915	1.25712	1.4698
sp|Q9BRJ6|CG050_HUMAN	5	439.09	3.18101e+06	3.99491e+06	4.11574e+06	1.25586	1.29385
sp|Q15287|RNPS1_HUMAN	1	57.46	87653.2	109797	119580	1.25263	1.36424
sp|Q96PU8|QKI_HUMAN	1	70.38	117577	147090	131592	1.251	1.1192
sp|Q9Y2P8|RCL1_HUMAN	1	56.93	35396.4	44244.3	43824.1	1.24996	1.23809
sp|Q9BRU9|UTP23_HUMAN	2	88.27	45722.3	57067.7	60469.9	1.24814	1.32255
sp|Q13610|PWP1_HUMAN	9	584.78	1.90856e+06	2.37849e+06	2.87432e+06	1.24622	1.50601
sp|Q9H2W6|RM46_HUMAN	11	968.34	1.09398e+07	1.36055e+07	1.28201e+07	1.24367	1.17188
sp|Q9NVU7|SDA1_HUMAN	3	191.26	120348	149339	152923	1.24089	1.27067
sp|Q9NP92|RT30_HUMAN	11	987.34	7.0277e+06	8.72036e+06	8.85982e+06	1.24086	1.2607
sp|Q7Z7H8|RM10_HUMAN	6	602.87	3.76347e+06	4.66673e+06	5.0841e+06	1.24001	1.35091
sp|Q9BZE1|RM37_HUMAN	16	1367.48	1.17491e+07	1.45164e+07	1.47912e+07	1.23553	1.25892
sp|Q96BP2|CHCH1_HUMAN	3	185.54	1.79691e+06	2.21965e+06	2.30414e+06	1.23526	1.28228
sp|P83111|LACTB_HUMAN	2	138.72	148028	182457	161529	1.23258	1.09121
sp|Q9Y6G3|RM42_HUMAN	4	398.4	496193	610686	637348	1.23074	1.28448
sp|Q9H7H0|MET17_HUMAN	3	133.7	255852	314722	307520	1.2301	1.20195
sp|P07437|TBB5_HUMAN	6	374.2	1.41693e+06	1.7408e+06	1.93781e+06	1.22857	1.36761
sp|Q13347|EIF3I_HUMAN	1	80.01	33728.1	41324.2	54843.2	1.22522	1.62604
sp|Q9Y3B7|RM11_HUMAN	5	462.44	3.96417e+06	4.85615e+06	4.74979e+06	1.22501	1.19818
sp|Q9H9J2|RM44_HUMAN	13	1113.22	8.99301e+06	1.09667e+07	1.12784e+07	1.21947	1.25413
sp|P67870|CSK2B_HUMAN	2	91.36	85488.8	103518	117907	1.21089	1.37921
sp|Q9BYD2|RM09_HUMAN	9	797.83	4.68537e+06	5.66714e+06	5.80294e+06	1.20954	1.23852
sp|Q8TAE8|G45IP_HUMAN	7	582.93	5.44538e+06	6.5766e+06	7.09393e+06	1.20774	1.30274
sp|P36873|PP1G_HUMAN	1	63.26	50866.2	61346	81348.1	1.20603	1.59926
sp|Q9BYC9|RM20_HUMAN	4	345.39	1.77597e+06	2.13882e+06	2.11857e+06	1.20431	1.19291
sp|Q8IZL8|PELP1_HUMAN	4	264.99	61858.5	74481.2	101101	1.20406	1.6344
sp|Q9NWT8|AKIP_HUMAN	1	31.62	353796	425693	429238	1.20321	1.21323
sp|P21127|CD11B_HUMAN	1	37.5	13287.1	15966.1	17270.8	1.20163	1.29981
sp|P52292|IMA1_HUMAN	8	646.96	1.76978e+06	2.12185e+06	2.52058e+06	1.19894	1.42423
sp|O14744|ANM5_HUMAN	8	560.22	1.33137e+06	1.59583e+06	1.80191e+06	1.19864	1.35343
sp|Q9NVS2|RT18A_HUMAN	6	441.33	2.73551e+06	3.27328e+06	3.63171e+06	1.19659	1.32762
sp|P68400|CSK21_HUMAN	1	41.85	52780.3	62964.7	73100.3	1.19296	1.38499
sp|P62310|LSM3_HUMAN	1	34.17	64919.5	77318.4	87022.6	1.19099	1.34047
sp|Q9H307|PININ_HUMAN	1	66.16	88920.6	105150	112768	1.18251	1.26819
sp|P78345|RPP38_HUMAN	2	117.28	36485.3	43138.5	40891.4	1.18235	1.12076
sp|P20042|IF2B_HUMAN	1	67.53	56826.1	67124.6	54698	1.18123	0.96255
sp|Q5JTW2|CEP78_HUMAN	1	60.87	11431	13486.2	16239.2	1.17979	1.42062
sp|Q5F1R6|DJC21_HUMAN	2	94.69	34732.2	40970.7	47126.4	1.17962	1.35685
sp|Q9UNI6|DUS12_HUMAN	4	246.42	617286	727951	888090	1.17928	1.4387
sp|O43159|RRP8_HUMAN	2	143.13	141296	166437	166593	1.17793	1.17903
sp|Q9NRX2|RM17_HUMAN	6	307.78	1.47787e+06	1.73771e+06	1.98712e+06	1.17582	1.34458
sp|Q96EL3|RM53_HUMAN	4	250.01	1.90331e+06	2.2332e+06	2.36777e+06	1.17332	1.24402
sp|Q9NX20|RM16_HUMAN	5	452.13	2.50022e+06	2.93242e+06	3.01919e+06	1.17286	1.20757
sp|Q6P1L8|RM14_HUMAN	3	230.76	897024	1.05082e+06	1.00809e+06	1.17145	1.12382
sp|Q9BVS4|RIOK2_HUMAN	6	428.44	813887	951494	1.14734e+06	1.16907	1.4097
sp|Q9Y291|RT33_HUMAN	3	192.75	1.65025e+06	1.92716e+06	2.11679e+06	1.16779	1.2827
sp|P14866|HNRPL_HUMAN	11	879.95	3.89668e+06	4.54244e+06	5.15206e+06	1.16572	1.32217
sp|O15235|RT12_HUMAN	3	229.22	803681	936623	1.00214e+06	1.16542	1.24694
sp|Q9HD33|RM47_HUMAN	6	329.91	2.43785e+06	2.83989e+06	3.25699e+06	1.16492	1.33601
sp|O14617|AP3D1_HUMAN	2	172.96	131341	152664	219601	1.16235	1.67199
sp|Q9H1I8|ASCC2_HUMAN	17	1372.14	6.08064e+06	7.06519e+06	7.08664e+06	1.16192	1.16544
sp|Q9Y262|EIF3L_HUMAN	5	319.14	461077	535445	580838	1.16129	1.25974
sp|P09001|RM03_HUMAN	8	698.08	3.85988e+06	4.47646e+06	4.81237e+06	1.15974	1.24677
sp|P09661|RU2A_HUMAN	9	681.93	4.6026e+06	5.3377e+06	5.7748e+06	1.15971	1.25468
sp|Q9NYK5|RM39_HUMAN	11	754.82	2.08548e+06	2.41813e+06	2.76519e+06	1.15951	1.32593
sp|Q15427|SF3B4_HUMAN	1	72.73	115106	133326	94387.3	1.1583	0.820007
sp|Q9BYD6|RM01_HUMAN	10	870.22	6.7691e+06	7.83298e+06	8.31248e+06	1.15717	1.228
sp|Q9H0U6|RM18_HUMAN	5	361.19	3.5448e+06	4.09634e+06	4.31188e+06	1.15559	1.2164
sp|Q9HAN9|NMNA1_HUMAN	1	61.06	137093	157851	167165	1.15142	1.21935
sp|Q96DV4|RM38_HUMAN	10	730.09	5.30574e+06	6.08871e+06	6.54048e+06	1.14757	1.23272
sp|Q7Z2W9|RM21_HUMAN	11	876.44	7.61426e+06	8.73194e+06	9.65379e+06	1.14679	1.26786
sp|Q9NWT1|PK1IP_HUMAN	3	167.74	239511	274615	331304	1.14656	1.38325
sp|Q13206|DDX10_HUMAN	8	415.96	457533	523529	580603	1.14424	1.26898
sp|Q9Y230|RUVB2_HUMAN	2	100.31	288565	329629	444136	1.1423	1.53912
sp|O75127|PTCD1_HUMAN	6	333.34	261316	298255	337270	1.14136	1.29066
sp|P46779|RL28_HUMAN	1	32.54	3.987e+06	4.54107e+06	4.50184e+06	1.13897	1.12913
sp|Q9NVP1|DDX18_HUMAN	8	489.37	1.05036e+06	1.19618e+06	1.66744e+06	1.13883	1.58749
sp|Q15397|PUM3_HUMAN	9	682.71	3.48107e+06	3.96194e+06	3.87466e+06	1.13814	1.11307
sp|O75683|SURF6_HUMAN	2	272.13	592682	673647	851326	1.13661	1.4364
sp|Q9NZB2|F120A_HUMAN	9	573.31	1.21072e+06	1.37568e+06	1.49626e+06	1.13625	1.23585
sp|Q9BYC8|RM32_HUMAN	4	534.5	2.83677e+06	3.22275e+06	3.13893e+06	1.13607	1.10652
sp|Q9Y333|LSM2_HUMAN	1	86.68	345122	392056	416877	1.13599	1.20791
sp|O60841|IF2P_HUMAN	4	239.35	381317	433166	464460	1.13597	1.21804
sp|Q9Y5T5|UBP16_HUMAN	2	113.61	75675.7	85939	104241	1.13562	1.37747
sp|Q6DKI1|RL7L_HUMAN	3	172.66	257576	292476	316908	1.13549	1.23035
sp|Q9ULX3|NOB1_HUMAN	7	632.28	5.17387e+06	5.87059e+06	6.04169e+06	1.13466	1.16773
sp|Q9P0M9|RM27_HUMAN	3	229.76	1.50106e+06	1.69826e+06	1.87389e+06	1.13138	1.24838
sp|Q92552|RT27_HUMAN	17	1341.53	2.13133e+07	2.41123e+07	2.7527e+07	1.13133	1.29154
sp|Q8WXX5|DNJC9_HUMAN	4	277.31	577223	652939	705147	1.13117	1.22162
sp|Q9P015|RM15_HUMAN	15	1106.21	4.58089e+06	5.17752e+06	5.65206e+06	1.13024	1.23383
sp|Q8N983|RM43_HUMAN	5	252.15	1.80411e+06	2.03287e+06	2.30596e+06	1.1268	1.27818
sp|Q6P161|RM54_HUMAN	4	305.87	2.14669e+06	2.41391e+06	2.93625e+06	1.12448	1.36781
sp|Q99848|EBP2_HUMAN	8	528.63	2.09598e+06	2.35618e+06	2.17259e+06	1.12414	1.03655
sp|A6NHT5|HMX3_HUMAN	1	150.65	3.80324e+06	4.26967e+06	4.59959e+06	1.12264	1.20939
sp|P62888|RL30_HUMAN	6	649.02	4.24638e+07	4.75273e+07	4.81553e+07	1.11924	1.13403
sp|Q8NE71|ABCF1_HUMAN	1	71.62	22534.3	25189.6	26259.2	1.11784	1.1653
sp|P22090|RS4Y1_HUMAN	4	394.09	1.59741e+06	1.77829e+06	1.71068e+06	1.11323	1.07091
sp|P49406|RM19_HUMAN	12	748.53	4.5247e+06	5.0325e+06	5.67212e+06	1.11223	1.25359
sp|O75394|RM33_HUMAN	2	98.95	219416	243908	251773	1.11162	1.14747
sp|Q92900|RENT1_HUMAN	10	584.12	719164	799398	826609	1.11156	1.1494
sp|P82664|RT10_HUMAN	8	593.06	4.56131e+06	5.06709e+06	5.86544e+06	1.11089	1.28591
sp|P51398|RT29_HUMAN	20	1934.9	2.30168e+07	2.55474e+07	2.86032e+07	1.10995	1.24271
sp|Q9Y3B2|EXOS1_HUMAN	2	124.22	97938.4	108704	104645	1.10993	1.06848
sp|Q9UMS4|PRP19_HUMAN	1	48.28	73278.3	81314.6	88673.7	1.10967	1.21009
sp|P63104|1433Z_HUMAN	2	121.38	22993.6	25442.6	30648	1.10651	1.33289
sp|P50750|CDK9_HUMAN	3	150.21	260100	287643	299316	1.1059	1.15078
sp|Q8N5N7|RM50_HUMAN	9	937.96	6.79277e+06	7.50913e+06	7.98742e+06	1.10546	1.17587
sp|P82650|RT22_HUMAN	15	1436.58	2.05403e+07	2.26649e+07	2.44953e+07	1.10344	1.19255
sp|P62081|RS7_HUMAN	10	792.91	9.18695e+07	1.01336e+08	1.1608e+08	1.10304	1.26353
sp|Q9Y2Z4|SYYM_HUMAN	2	125.16	139203	153545	167931	1.10303	1.20637
sp|Q9Y4W2|LAS1L_HUMAN	3	193.37	119092	131137	170701	1.10114	1.43335
sp|O43709|WBS22_HUMAN	1	77.92	169533	186614	187701	1.10075	1.10716
sp|Q7Z7F7|RM55_HUMAN	1	79.29	187811	206172	237521	1.09776	1.26468
sp|Q15650|TRIP4_HUMAN	12	877.71	4.04447e+06	4.43384e+06	4.54407e+06	1.09627	1.12353
sp|Q9NQ50|RM40_HUMAN	5	575.19	3.16015e+06	3.46428e+06	4.04836e+06	1.09624	1.28107
sp|Q8IXM3|RM41_HUMAN	7	417.46	9.0903e+06	9.96011e+06	1.12649e+07	1.09569	1.23923
sp|Q86V81|THOC4_HUMAN	1	89.15	144914	158734	193813	1.09537	1.33744
sp|Q8N3C0|ASCC3_HUMAN	46	3122.45	9.15092e+06	1.00184e+07	1.14016e+07	1.0948	1.24595
sp|P82930|RT34_HUMAN	9	730.88	1.4835e+07	1.61876e+07	1.76869e+07	1.09118	1.19225
sp|Q9NUL7|DDX28_HUMAN	5	307.55	326501	355700	342361	1.08943	1.04858
sp|O75533|SF3B1_HUMAN	16	951.55	1.8227e+06	1.98481e+06	1.87535e+06	1.08894	1.02889
sp|Q969S3|ZN622_HUMAN	8	810.42	3.12539e+06	3.40334e+06	3.72675e+06	1.08893	1.19241
sp|Q71RC2|LARP4_HUMAN	3	186.08	275096	299181	330359	1.08755	1.20089
sp|Q14692|BMS1_HUMAN	4	220.57	112313	122067	152059	1.08685	1.35389
sp|Q15024|EXOS7_HUMAN	3	183.97	1.13438e+06	1.23123e+06	1.2852e+06	1.08538	1.13296
sp|Q09666|AHNK_HUMAN	1	30.27	45728.5	49632.4	62535.3	1.08537	1.36754
sp|P38159|RBMX_HUMAN	2	115.11	293818	318255	307435	1.08317	1.04635
sp|Q9NXF1|TEX10_HUMAN	5	309.89	220012	238086	269745	1.08215	1.22605
sp|Q14137|BOP1_HUMAN	2	134.42	56665	61302	76040.1	1.08183	1.34192
sp|P82675|RT05_HUMAN	12	794.44	7.79197e+06	8.4294e+06	9.15051e+06	1.08181	1.17435
sp|P62312|LSM6_HUMAN	1	44.01	48431.2	52357.5	52042.1	1.08107	1.07456
sp|Q9NWU5|RM22_HUMAN	5	318.29	4.90025e+06	5.292e+06	5.71294e+06	1.07994	1.16585
sp|P82912|RT11_HUMAN	5	504.44	4.16707e+06	4.49956e+06	4.47819e+06	1.07979	1.07466
sp|O76094|SRP72_HUMAN	28	2519.06	3.41842e+07	3.68956e+07	4.11515e+07	1.07932	1.20382
sp|P46783|RS10_HUMAN	8	714.31	4.1078e+07	4.43343e+07	5.29737e+07	1.07927	1.28959
sp|Q5T653|RM02_HUMAN	5	520.78	2.38978e+06	2.57813e+06	2.70941e+06	1.07881	1.13375
sp|Q9BQE3|TBA1C_HUMAN	1	41.52	102618	110534	114639	1.07714	1.11714
sp|Q13084|RM28_HUMAN	14	1195.21	1.05164e+07	1.13194e+07	1.24745e+07	1.07636	1.1862
sp|Q9Y3D9|RT23_HUMAN	8	629.22	7.00896e+06	7.53932e+06	8.22372e+06	1.07567	1.17331
sp|Q14152|EIF3A_HUMAN	8	444.24	1.41091e+06	1.51755e+06	1.46232e+06	1.07558	1.03643
sp|Q9Y676|RT18B_HUMAN	8	877.37	1.96703e+07	2.11311e+07	2.24298e+07	1.07426	1.14028
sp|O95478|NSA2_HUMAN	1	40.27	70986.3	76223.2	93378.4	1.07377	1.31544
sp|P42766|RL35_HUMAN	3	269.42	1.07394e+07	1.15261e+07	1.14743e+07	1.07325	1.06842
sp|Q5T3I0|GPTC4_HUMAN	6	404.53	280691	301242	297698	1.07322	1.06059
sp|Q9H6R4|NOL6_HUMAN	7	540.15	1.36317e+06	1.46269e+06	1.48826e+06	1.07301	1.09176
sp|P12956|XRCC6_HUMAN	3	167.56	184664	197811	229452	1.07119	1.24254
sp|Q8N9T8|KRI1_HUMAN	1	64.01	55777.2	59692	54709.1	1.07019	0.980852
sp|Q4G0J3|LARP7_HUMAN	13	1014.6	4.64152e+06	4.96367e+06	5.36304e+06	1.06941	1.15545
sp|Q96GQ7|DDX27_HUMAN	8	508.1	1.87882e+06	2.00838e+06	2.04946e+06	1.06896	1.09082
sp|Q9UN81|LORF1_HUMAN	5	353.79	990701	1.0562e+06	1.01681e+06	1.06612	1.02635
sp|Q02543|RL18A_HUMAN	9	637.36	2.89333e+07	3.08424e+07	3.34263e+07	1.06598	1.15529
sp|Q9Y2R9|RT07_HUMAN	10	818.32	9.85806e+06	1.04849e+07	1.00828e+07	1.06359	1.02279
sp|P78346|RPP30_HUMAN	2	132.04	73031.1	77642.2	106803	1.06314	1.46244
sp|P82673|RT35_HUMAN	14	1144.65	6.93776e+06	7.3692e+06	8.48386e+06	1.06219	1.22285
sp|P62854|RS26_HUMAN	5	472.5	3.58807e+07	3.80417e+07	4.05748e+07	1.06023	1.13083
sp|Q8WVC0|LEO1_HUMAN	4	240.95	1.52645e+06	1.61782e+06	1.90503e+06	1.05985	1.24801
sp|Q96EH3|MASU1_HUMAN	2	130.89	419996	445038	501851	1.05962	1.1949
sp|O43818|U3IP2_HUMAN	3	213.06	458266	485087	499370	1.05853	1.0897
sp|P46781|RS9_HUMAN	11	637.94	6.32832e+07	6.69056e+07	6.82335e+07	1.05724	1.07822
sp|Q8IY81|SPB1_HUMAN	7	448.84	1.51888e+06	1.60166e+06	1.46407e+06	1.0545	0.963911
sp|Q8NC60|NOA1_HUMAN	13	888.45	2.81818e+06	2.9685e+06	3.08342e+06	1.05334	1.09412
sp|O75821|EIF3G_HUMAN	3	156.02	185339	194818	172503	1.05114	0.930746
sp|O95758|PTBP3_HUMAN	1	40.82	28788	30256.9	26119.2	1.05102	0.907294
sp|Q96GA3|LTV1_HUMAN	13	996.86	4.20083e+06	4.41295e+06	4.81168e+06	1.05049	1.14541
sp|Q99613|EIF3C_HUMAN	6	372.08	425171	446160	480792	1.04937	1.13082
sp|Q02878|RL6_HUMAN	9	933.57	5.95257e+07	6.24551e+07	6.63442e+07	1.04921	1.11455
sp|P62891|RL39_HUMAN	1	110.36	3.51385e+06	3.68355e+06	3.54288e+06	1.0483	1.00826
sp|Q9BRJ2|RM45_HUMAN	10	792.72	5.62312e+06	5.89019e+06	6.25088e+06	1.0475	1.11164
sp|Q5RKV6|EXOS6_HUMAN	4	292.39	143984	150540	146538	1.04554	1.01774
sp|Q9Y324|FCF1_HUMAN	1	40.22	69566.9	72732.7	82231.4	1.04551	1.18205
sp|P61353|RL27_HUMAN	5	413.4	2.13934e+07	2.23493e+07	2.23603e+07	1.04468	1.0452
sp|P40429|RL13A_HUMAN	5	315.56	2.82337e+07	2.94284e+07	3.08075e+07	1.04232	1.09116
sp|Q13242|SRSF9_HUMAN	1	66.47	32524.3	33892.5	36767.3	1.04207	1.13046
sp|P05783|K1C18_HUMAN	8	566.85	1.44937e+06	1.50142e+06	1.80025e+06	1.03591	1.24209
sp|Q13435|SF3B2_HUMAN	3	167.42	168640	174660	175888	1.0357	1.04298
sp|Q15050|RRS1_HUMAN	4	269.77	607560	628933	637966	1.03518	1.05005
sp|P61254|RL26_HUMAN	3	145.14	1.08617e+07	1.12346e+07	1.27817e+07	1.03434	1.17677
sp|Q9HCE1|MOV10_HUMAN	25	1629.57	4.76276e+06	4.9249e+06	5.3317e+06	1.03404	1.11946
sp|Q8NCA5|FA98A_HUMAN	2	149.69	182668	188749	192520	1.03329	1.05393
sp|Q16778|H2B2E_HUMAN	2	84.09	443334	458076	531764	1.03325	1.19947
sp|Q9Y6M1|IF2B2_HUMAN	10	955.76	5.3498e+06	5.52618e+06	6.32112e+06	1.03297	1.18156
sp|P82914|RT15_HUMAN	6	331.87	3.90045e+06	4.02611e+06	4.8623e+06	1.03222	1.2466
sp|O75616|ERAL1_HUMAN	6	347.05	1.37488e+06	1.41916e+06	1.28353e+06	1.03221	0.93356
sp|Q9NRX1|PNO1_HUMAN	7	581.4	2.57646e+06	2.65906e+06	3.08567e+06	1.03206	1.19764
sp|Q92665|RT31_HUMAN	10	1004.04	1.47066e+07	1.51713e+07	1.69265e+07	1.0316	1.15095
sp|P82932|RT06_HUMAN	5	248.75	2.45135e+06	2.52801e+06	2.74094e+06	1.03127	1.11813
sp|Q9UI30|TR112_HUMAN	2	137.45	414263	426847	446592	1.03038	1.07804
sp|P36578|RL4_HUMAN	24	2402.35	1.10857e+08	1.14162e+08	1.22039e+08	1.02981	1.10087
sp|Q99877|H2B1N_HUMAN	5	276.97	7.51823e+06	7.73793e+06	9.81222e+06	1.02922	1.30512
sp|P05388|RLA0_HUMAN	19	1941.95	1.28201e+08	1.31923e+08	1.41193e+08	1.02903	1.10134
sp|A6NFI3|ZN316_HUMAN	1	70.88	136924	140874	156147	1.02884	1.14039
sp|Q9NQX6|ZN331_HUMAN	5	336.47	1.46075e+06	1.50041e+06	1.61724e+06	1.02715	1.10713
sp|P46087|NOP2_HUMAN	9	563.75	2.38312e+06	2.44666e+06	2.5091e+06	1.02666	1.05287
sp|Q99459|CDC5L_HUMAN	3	203.81	406553	416386	584058	1.02419	1.43661
sp|Q9Y2W1|TR150_HUMAN	1	68.63	87600.7	89673.3	71180.1	1.02366	0.812552
sp|P26373|RL13_HUMAN	8	401.13	2.34494e+07	2.40042e+07	2.63052e+07	1.02366	1.12179
sp|P61313|RL15_HUMAN	10	814.64	3.81787e+07	3.90578e+07	4.11977e+07	1.02303	1.07908
sp|P08865|RSSA_HUMAN	20	2044.65	2.57625e+08	2.63513e+08	2.96848e+08	1.02285	1.15225
sp|Q5VWQ0|RSBN1_HUMAN	2	146.29	109793	112296	125939	1.0228	1.14706
sp|Q07020|RL18_HUMAN	9	665.34	4.85744e+07	4.96553e+07	5.34238e+07	1.02225	1.09983
sp|AP054|TRYP_PIG	3	337.73	4.85045e+06	4.95647e+06	6.74112e+06	1.02186	1.38979
sp|Q53EL6|PDCD4_HUMAN	8	509.99	1.6202e+06	1.65356e+06	1.87567e+06	1.02059	1.15767
sp|O60524|NEMF_HUMAN	2	141.4	143659	146388	148726	1.01899	1.03527
sp|Q9GZS3|WDR61_HUMAN	6	548.11	4.37197e+06	4.45287e+06	5.06638e+06	1.01851	1.15883
sp|P04406|G3P_HUMAN	2	100.05	92278.8	93844.1	69546.8	1.01696	0.75366
sp|Q9NSI2|F207A_HUMAN	5	372.85	554851	564122	593267	1.01671	1.06924
sp|P49458|SRP09_HUMAN	2	108.03	3.91484e+06	3.97783e+06	1.03271e+07	1.01609	2.63793
sp|Q9NR30|DDX21_HUMAN	23	1890.39	1.23848e+07	1.25788e+07	1.32863e+07	1.01566	1.07278
sp|P62424|RL7A_HUMAN	18	2200.78	8.56611e+07	8.69805e+07	9.78579e+07	1.0154	1.14238
sp|Q16777|H2A2C_HUMAN	4	514.45	1.2496e+07	1.26869e+07	1.4941e+07	1.01528	1.19566
sp|P62241|RS8_HUMAN	11	887.92	1.82593e+08	1.85379e+08	1.84196e+08	1.01526	1.00878
sp|P61221|ABCE1_HUMAN	9	713.14	3.52197e+06	3.56793e+06	4.18425e+06	1.01305	1.18804
sp|P62280|RS11_HUMAN	12	820.79	5.51244e+07	5.58107e+07	5.95916e+07	1.01245	1.08104
sp|Q9BQA1|MEP50_HUMAN	4	229.42	828179	838435	674347	1.01238	0.814252
sp|Q15020|SART3_HUMAN	18	1271.05	3.98821e+06	4.03475e+06	5.13194e+06	1.01167	1.28678
sp|Q9Y3D3|RT16_HUMAN	5	404.79	4.62111e+06	4.67444e+06	5.04064e+06	1.01154	1.09078
sp|Q13895|BYST_HUMAN	17	1261.47	5.36623e+06	5.42714e+06	5.90014e+06	1.01135	1.09949
sp|P83731|RL24_HUMAN	4	226.29	1.35901e+07	1.37309e+07	1.58589e+07	1.01036	1.16695
sp|P39019|RS19_HUMAN	7	530.14	6.69233e+07	6.75905e+07	7.04405e+07	1.00997	1.05255
sp|P62753|RS6_HUMAN	9	727.17	6.57313e+07	6.63624e+07	7.1955e+07	1.0096	1.09468
sp|O00303|EIF3F_HUMAN	1	88.28	231615	233795	250179	1.00941	1.08015
sp|Q7Z4V5|HDGR2_HUMAN	2	124.01	847271	855021	937978	1.00915	1.10706
sp|Q8TDD1|DDX54_HUMAN	2	122.38	166651	168139	167105	1.00893	1.00272
sp|P05386|RLA1_HUMAN	11	1250.63	6.49579e+07	6.55189e+07	7.65132e+07	1.00864	1.17789
sp|P49207|RL34_HUMAN	2	64.66	9.78174e+06	9.86464e+06	1.01773e+07	1.00847	1.04044
sp|Q6P1J9|CDC73_HUMAN	10	650.58	2.33899e+06	2.35809e+06	2.40886e+06	1.00817	1.02987
sp|Q6PKG0|LARP1_HUMAN	28	2253.89	1.83858e+07	1.85127e+07	1.96158e+07	1.0069	1.0669
sp|O00571|DDX3X_HUMAN	5	456.62	862942	868597	922100	1.00655	1.06855
sp|Q9UHB9|SRP68_HUMAN	29	2501.17	3.06092e+07	3.0778e+07	3.55887e+07	1.00551	1.16268
sp|P05787|K2C8_HUMAN	11	755.8	4.44157e+06	4.46155e+06	5.08236e+06	1.0045	1.14427
sp|P30050|RL12_HUMAN	8	878.01	7.5126e+07	7.54575e+07	8.04872e+07	1.00441	1.07136
sp|Q9NV31|IMP3_HUMAN	1	61.47	56750.6	56997.7	55143.4	1.00435	0.971679
sp|P49411|EFTU_HUMAN	22	1874.2	2.12393e+07	2.13096e+07	2.52626e+07	1.00331	1.18943
sp|P82933|RT09_HUMAN	16	1204.07	1.26599e+07	1.26856e+07	1.40224e+07	1.00203	1.10762
sp|Q13310|PABP4_HUMAN	15	1073.94	8.70661e+06	8.71731e+06	9.1463e+06	1.00123	1.0505
sp|Q9Y2Q9|RT28_HUMAN	5	429.11	5.56845e+06	5.57324e+06	6.174e+06	1.00086	1.10875
sp|Q9NZI8|IF2B1_HUMAN	14	1089.05	2.11473e+07	2.11573e+07	2.59077e+07	1.00047	1.22511
sp|P18077|RL35A_HUMAN	3	121.76	5.11301e+06	5.10861e+06	5.19955e+06	0.99914	1.01693
sp|P62249|RS16_HUMAN	11	712.12	6.80722e+07	6.8007e+07	7.20759e+07	0.999041	1.05882
sp|Q9Y2R5|RT17_HUMAN	5	457.14	8.74546e+06	8.72917e+06	9.29579e+06	0.998137	1.06293
sp|P82663|RT25_HUMAN	9	846.61	1.03819e+07	1.03489e+07	1.06014e+07	0.996813	1.02114
sp|P63220|RS21_HUMAN	7	677.33	1.58599e+07	1.58005e+07	1.78742e+07	0.996257	1.12701
sp|Q7L2J0|MEPCE_HUMAN	9	769.24	4.17563e+06	4.15248e+06	4.56384e+06	0.994456	1.09297
sp|P16401|H15_HUMAN	5	329.2	5.99553e+06	5.9564e+06	6.81936e+06	0.993474	1.13741
sp|Q96ST2|IWS1_HUMAN	5	259.09	1.10137e+06	1.09403e+06	1.37224e+06	0.993339	1.24594
sp|P18621|RL17_HUMAN	8	809.97	3.48898e+07	3.46204e+07	3.93786e+07	0.992279	1.12865
sp|P55209|NP1L1_HUMAN	8	600.02	3.33949e+06	3.31311e+06	4.42311e+06	0.992099	1.32448
sp|O76021|RL1D1_HUMAN	16	1245.75	1.36947e+07	1.3579e+07	1.45235e+07	0.991553	1.06053
sp|Q09161|NCBP1_HUMAN	13	1077.13	4.36593e+06	4.32464e+06	4.93716e+06	0.990543	1.13084
sp|Q96EL2|RT24_HUMAN	6	349.12	1.76054e+06	1.73964e+06	2.20235e+06	0.988124	1.25095
sp|P62269|RS18_HUMAN	9	536.57	5.10892e+07	5.04777e+07	5.64496e+07	0.988031	1.10492
sp|Q1ED39|KNOP1_HUMAN	1	60.96	70950.2	69931.1	89162.5	0.985636	1.25669
sp|Q9BQG0|MBB1A_HUMAN	16	1145.22	1.79153e+06	1.76335e+06	2.00002e+06	0.984273	1.11638
sp|P46776|RL27A_HUMAN	5	426.25	3.12156e+07	3.07196e+07	3.24247e+07	0.984113	1.03874
sp|P17844|DDX5_HUMAN	18	1314.49	1.15797e+07	1.13935e+07	1.23853e+07	0.983921	1.06957
sp|P18124|RL7_HUMAN	16	1363.25	8.07712e+07	7.9383e+07	8.51495e+07	0.982813	1.05421
sp|Q9GZR7|DDX24_HUMAN	10	864.69	1.94975e+06	1.9161e+06	2.06556e+06	0.982745	1.0594
sp|Q96A35|RM24_HUMAN	6	359.01	2.63199e+06	2.58578e+06	2.83131e+06	0.982444	1.07573
sp|P62899|RL31_HUMAN	5	319.14	2.66919e+07	2.62178e+07	2.83249e+07	0.982237	1.06118
sp|P11021|GRP78_HUMAN	8	520.42	1.45868e+06	1.43e+06	1.65122e+06	0.980339	1.132
sp|P22626|ROA2_HUMAN	5	461.62	1.63717e+06	1.6044e+06	1.87163e+06	0.979981	1.14321
sp|P27635|RL10_HUMAN	11	929.76	1.40508e+07	1.37622e+07	1.9438e+07	0.97946	1.38341
sp|E9PRG8|CK098_HUMAN	1	71.81	674199	660213	671714	0.979256	0.996315
sp|P50914|RL14_HUMAN	5	420.38	3.84744e+07	3.7671e+07	3.96114e+07	0.979118	1.02955
sp|Q13823|NOG2_HUMAN	9	614.53	2.19349e+06	2.14721e+06	2.1234e+06	0.978899	0.968045
sp|Q969Q0|RL36L_HUMAN	1	62.23	484228	473504	493546	0.977854	1.01924
sp|Q13263|TIF1B_HUMAN	16	1303.6	7.85253e+06	7.67583e+06	8.66086e+06	0.977498	1.10294
sp|P62906|RL10A_HUMAN	11	1237.9	3.72323e+07	3.63777e+07	4.10293e+07	0.977048	1.10198
sp|P37802|TAGL2_HUMAN	2	136.66	235919	230468	226238	0.976895	0.958965
sp|Q9Y3A4|RRP7A_HUMAN	5	336.5	1.06798e+06	1.04246e+06	1.10892e+06	0.976098	1.03833
sp|P63173|RL38_HUMAN	5	425.88	1.12883e+07	1.10178e+07	1.19932e+07	0.976037	1.06244
sp|P32969|RL9_HUMAN	13	1258.34	5.87703e+07	5.73251e+07	6.57203e+07	0.975409	1.11826
sp|Q15393|SF3B3_HUMAN	11	761.7	1.55366e+06	1.51496e+06	1.67112e+06	0.975093	1.07561
sp|P11940|PABP1_HUMAN	28	2036.63	3.64751e+07	3.55241e+07	3.66628e+07	0.973928	1.00515
sp|Q00987|MDM2_HUMAN	2	177.51	116503	113458	113226	0.973863	0.97187
sp|P07814|SYEP_HUMAN	26	1894.81	7.47808e+06	7.28015e+06	8.67981e+06	0.973533	1.1607
sp|Q00839|HNRPU_HUMAN	18	1285.2	2.10107e+07	2.04467e+07	2.53791e+07	0.973155	1.20791
sp|Q13601|KRR1_HUMAN	5	264.04	1.06321e+06	1.03439e+06	1.13983e+06	0.972892	1.07206
sp|A5A3E0|POTEF_HUMAN	1	69.41	213907	208023	235579	0.972495	1.10131
sp|Q13243|SRSF5_HUMAN	5	319.83	5.4784e+06	5.32503e+06	5.47679e+06	0.972004	0.999706
sp|P56537|IF6_HUMAN	11	1084.53	1.80029e+07	1.74945e+07	1.87991e+07	0.971763	1.04423
sp|Q8N7H5|PAF1_HUMAN	13	928.6	5.3699e+06	5.21805e+06	5.84141e+06	0.971722	1.08781
sp|P46013|KI67_HUMAN	1	58.29	124111	120498	123466	0.970887	0.994801
sp|P68363|TBA1B_HUMAN	8	509.3	2.27913e+06	2.20936e+06	2.41808e+06	0.969386	1.06097
sp|Q9BZE4|NOG1_HUMAN	9	722.23	4.15464e+06	4.02454e+06	4.43425e+06	0.968687	1.0673
sp|Q13283|G3BP1_HUMAN	8	551.1	2.87046e+06	2.7796e+06	3.57107e+06	0.968347	1.24408
sp|P62750|RL23A_HUMAN	8	557.88	2.48046e+07	2.40144e+07	2.61862e+07	0.968145	1.0557
sp|Q8NEJ9|NGDN_HUMAN	1	79.65	131833	127614	128699	0.967992	0.976227
sp|Q96I24|FUBP3_HUMAN	1	36.72	73180.1	70830.1	83237.2	0.967888	1.13743
sp|Q8NC51|PAIRB_HUMAN	12	962.03	1.72783e+07	1.67022e+07	1.86993e+07	0.966658	1.08224
sp|P05387|RLA2_HUMAN	16	1886.35	1.47401e+08	1.42473e+08	1.48196e+08	0.96657	1.00539
sp|Q9NX58|LYAR_HUMAN	14	1347.78	1.27987e+07	1.23686e+07	1.40666e+07	0.966395	1.09906
sp|P46778|RL21_HUMAN	5	476.23	1.4719e+07	1.42234e+07	1.592e+07	0.966332	1.0816
sp|P47914|RL29_HUMAN	1	145.18	1.84907e+07	1.78653e+07	1.77844e+07	0.966177	0.961801
sp|P60866|RS20_HUMAN	5	623.56	3.85662e+07	3.72407e+07	4.00035e+07	0.965632	1.03727
sp|Q9Y3U8|RL36_HUMAN	5	271.4	1.47626e+07	1.42499e+07	1.63442e+07	0.965271	1.10713
sp|Q9BYN8|RT26_HUMAN	5	306.28	1.98505e+06	1.9158e+06	2.66318e+06	0.965116	1.34162
sp|P46782|RS5_HUMAN	8	832.53	1.06043e+08	1.02308e+08	1.14591e+08	0.964781	1.08061
sp|P84098|RL19_HUMAN	3	396.23	2.66274e+07	2.56643e+07	2.611e+07	0.963833	0.980572
sp|P63244|GBLP_HUMAN	30	2838.1	3.04023e+08	2.92988e+08	3.10421e+08	0.963704	1.02105
sp|Q14978|NOLC1_HUMAN	1	73.5	302379	290925	396612	0.962122	1.31164
sp|P62851|RS25_HUMAN	5	308.2	5.14256e+07	4.93564e+07	5.0977e+07	0.959764	0.991278
sp|Q5VYS8|TUT7_HUMAN	4	212.76	113805	109149	126532	0.959084	1.11183
sp|P61011|SRP54_HUMAN	20	1595.79	1.68659e+07	1.61677e+07	1.95158e+07	0.9586	1.15712
sp|Q96EY7|PTCD3_HUMAN	23	2223.08	2.53159e+07	2.42428e+07	2.7291e+07	0.957609	1.07802
sp|P22087|FBRL_HUMAN	5	348.83	1.17916e+06	1.12847e+06	1.29876e+06	0.957015	1.10143
sp|P51991|ROA3_HUMAN	4	334.09	863591	825909	1.35246e+06	0.956366	1.56609
sp|P62857|RS28_HUMAN	4	217.73	2.04643e+07	1.95293e+07	2.01774e+07	0.954308	0.985981
sp|P23246|SFPQ_HUMAN	4	266.53	243334	232036	259849	0.95357	1.06787
sp|O60783|RT14_HUMAN	3	306.64	4.13689e+06	3.94393e+06	4.71424e+06	0.953356	1.13956
sp|P39023|RL3_HUMAN	18	1816.45	4.99755e+07	4.76412e+07	5.12675e+07	0.953291	1.02585
sp|Q9NUD5|ZCHC3_HUMAN	1	57.36	91044.4	86685.6	94177.7	0.952124	1.03442
sp|P61978|HNRPK_HUMAN	8	628.46	3.11154e+06	2.96234e+06	3.39997e+06	0.952048	1.0927
sp|Q2NL82|TSR1_HUMAN	17	1365.5	1.05341e+07	1.00263e+07	1.13905e+07	0.951799	1.0813
sp|P11142|HSP7C_HUMAN	10	946.5	2.72751e+06	2.59385e+06	2.95361e+06	0.950996	1.0829
sp|P10412|H14_HUMAN	7	566.64	3.03572e+07	2.88275e+07	3.36058e+07	0.949611	1.10701
sp|P23396|RS3_HUMAN	20	1448.97	1.75497e+08	1.66602e+08	1.85316e+08	0.949315	1.05595
sp|P09132|SRP19_HUMAN	5	462.28	1.22531e+07	1.16178e+07	1.42232e+07	0.948153	1.16079
sp|E9PAV3|NACAM_HUMAN	5	392.37	1.83467e+06	1.73934e+06	1.92922e+06	0.948038	1.05153
sp|P29558|RBMS1_HUMAN	2	161.08	237310	224669	297106	0.946729	1.25197
sp|P55769|NH2L1_HUMAN	6	291.73	1.80476e+06	1.70759e+06	1.87293e+06	0.946156	1.03777
sp|Q9BQ67|GRWD1_HUMAN	6	423.74	1.60851e+06	1.52042e+06	1.85764e+06	0.94524	1.15488
sp|P78316|NOP14_HUMAN	1	52.5	46736.2	44176.5	33685.9	0.945232	0.720768
sp|Q6PD62|CTR9_HUMAN	12	805.1	2.89474e+06	2.72739e+06	3.01681e+06	0.942188	1.04217
sp|P25398|RS12_HUMAN	9	852.15	5.17154e+07	4.87188e+07	5.31587e+07	0.942056	1.02791
sp|P07355|ANXA2_HUMAN	5	288.85	284443	267867	289872	0.941724	1.01909
sp|Q9BQ39|DDX50_HUMAN	4	240.73	142040	133746	162104	0.941606	1.14125
sp|P43243|MATR3_HUMAN	2	85.92	145217	136689	142643	0.941274	0.982281
sp|Q9UGY1|NOL12_HUMAN	1	34.29	37985.6	35753.3	33699.1	0.941233	0.887153
sp|Q71UM5|RS27L_HUMAN	1	145	7.25443e+06	6.82545e+06	6.17378e+06	0.940867	0.851037
sp|P15880|RS2_HUMAN	14	1192.91	1.2427e+08	1.16897e+08	1.3795e+08	0.940671	1.11009
sp|Q9UHA3|RLP24_HUMAN	1	46.79	181900	170993	173386	0.940037	0.953193
sp|Q92841|DDX17_HUMAN	14	881.78	6.85245e+06	6.42778e+06	6.93054e+06	0.938027	1.0114
sp|Q9BVP2|GNL3_HUMAN	9	791.37	2.46801e+06	2.31279e+06	2.58204e+06	0.93711	1.0462
sp|O00567|NOP56_HUMAN	6	425.69	1.4678e+06	1.37537e+06	1.63412e+06	0.937032	1.11331
sp|P62917|RL8_HUMAN	10	1037.42	2.711e+07	2.53963e+07	3.09654e+07	0.936788	1.14221
sp|P49590|SYHM_HUMAN	13	821.78	4.32986e+06	4.05607e+06	5.07747e+06	0.936766	1.17266
sp|Q9UN86|G3BP2_HUMAN	1	87.86	215344	201579	240586	0.93608	1.11722
sp|Q9NQT5|EXOS3_HUMAN	2	114.57	352223	329321	277627	0.934978	0.788214
sp|P62316|SMD2_HUMAN	5	449.18	2.10767e+06	1.97022e+06	2.1237e+06	0.934784	1.0076
sp|P61513|RL37A_HUMAN	2	282.74	1.48157e+07	1.38472e+07	1.48523e+07	0.934635	1.00247
sp|P62910|RL32_HUMAN	7	676.85	1.86973e+07	1.74643e+07	1.97354e+07	0.934058	1.05552
sp|P41214|EIF2D_HUMAN	8	658.73	1.98455e+06	1.85344e+06	1.95657e+06	0.933935	0.985901
sp|Q04637|IF4G1_HUMAN	2	116.77	68632.5	64019.1	69104.4	0.932781	1.00688
sp|Q9BUJ2|HNRL1_HUMAN	17	1573.16	1.10395e+07	1.02851e+07	1.15856e+07	0.931665	1.04946
sp|P61247|RS3A_HUMAN	16	1203.64	8.25337e+07	7.67987e+07	8.65949e+07	0.930513	1.04921
sp|Q92615|LAR4B_HUMAN	3	226.11	245292	228239	239651	0.930481	0.977006
sp|P37108|SRP14_HUMAN	4	257.25	9.34091e+06	8.69053e+06	2.27248e+07	0.930373	2.43282
sp|Q13247|SRSF6_HUMAN	5	314.29	4.78289e+06	4.44062e+06	4.75097e+06	0.928439	0.993324
sp|Q9NVV4|PAPD1_HUMAN	1	41.05	15165.9	14073.4	20738.7	0.927959	1.36745
sp|Q5SSJ5|HP1B3_HUMAN	5	340.82	1.63798e+06	1.51753e+06	1.89464e+06	0.926468	1.15669
sp|P08708|RS17_HUMAN	10	1148.82	8.74417e+07	8.09765e+07	9.2089e+07	0.926062	1.05315
sp|P05198|IF2A_HUMAN	1	52.88	68649.9	63421.7	63996	0.923843	0.932209
sp|P62979|RS27A_HUMAN	4	431.7	2.02023e+07	1.86445e+07	2.05282e+07	0.922888	1.01613
sp|Q86TS9|RM52_HUMAN	3	235.49	1.01941e+06	938727	1.39928e+06	0.920853	1.37264
sp|Q5JTH9|RRP12_HUMAN	20	1504.6	7.07145e+06	6.51042e+06	7.9207e+06	0.920662	1.1201
sp|P62273|RS29_HUMAN	3	206.89	9.44748e+06	8.67852e+06	9.72104e+06	0.918607	1.02895
sp|P42696|RBM34_HUMAN	4	260.39	714246	655947	789597	0.918377	1.1055
sp|P62701|RS4X_HUMAN	15	1274.93	8.5173e+07	7.8193e+07	8.95369e+07	0.918049	1.05124
sp|Q9Y3E5|PTH2_HUMAN	2	125.93	81809.7	75073.8	91275	0.917664	1.1157
sp|P82921|RT21_HUMAN	2	148.31	1.37515e+06	1.26127e+06	1.61101e+06	0.917186	1.17151
sp|P62244|RS15A_HUMAN	6	330.68	2.62632e+07	2.40546e+07	2.71803e+07	0.915904	1.03492
sp|P62266|RS23_HUMAN	6	617.65	5.41682e+07	4.95946e+07	5.88254e+07	0.915565	1.08598
sp|O43290|SNUT1_HUMAN	1	90.23	30077.8	27526.8	27643.2	0.915186	0.919057
sp|Q9BRS2|RIOK1_HUMAN	3	187.22	522431	477341	511172	0.913693	0.978449
sp|Q96D46|NMD3_HUMAN	3	196.51	400024	365106	390880	0.912711	0.977142
sp|Q96B26|EXOS8_HUMAN	2	110.68	115244	105153	113315	0.912437	0.983263
sp|Q99714|HCD2_HUMAN	4	326.03	312469	284769	355602	0.911351	1.13804
sp|Q9Y3D5|RT18C_HUMAN	3	285.54	4.90452e+06	4.46476e+06	5.46502e+06	0.910334	1.11428
sp|P52272|HNRPM_HUMAN	5	288.03	1.75107e+06	1.59308e+06	1.78636e+06	0.909773	1.02015
sp|P14174|MIF_HUMAN	1	35.27	110139	100130	90252.7	0.909118	0.819442
sp|P62995|TRA2B_HUMAN	1	87.91	346160	314660	286907	0.909003	0.828829
sp|P62263|RS14_HUMAN	15	1584.98	7.57335e+07	6.87915e+07	8.22789e+07	0.908337	1.08643
sp|P13639|EF2_HUMAN	35	3037.34	5.51971e+07	4.99491e+07	5.66053e+07	0.904922	1.02551
sp|Q9BYG3|MK67I_HUMAN	5	467.43	1.89236e+06	1.71096e+06	2.55364e+06	0.90414	1.34945
sp|P46777|RL5_HUMAN	15	1403.31	5.82636e+07	5.26535e+07	5.86657e+07	0.903711	1.0069
sp|Q00341|VIGLN_HUMAN	5	324.8	685584	618827	648762	0.902628	0.946291
sp|Q14444|CAPR1_HUMAN	5	302.38	702452	633625	802481	0.902019	1.1424
sp|P07910|HNRPC_HUMAN	4	296.11	1.59646e+06	1.43852e+06	1.57176e+06	0.901067	0.984523
sp|P62861|RS30_HUMAN	2	140.08	1.36008e+07	1.22508e+07	1.29363e+07	0.900738	0.951138
sp|Q7Z478|DHX29_HUMAN	1	66.44	13907.4	12515.5	10985.3	0.899916	0.789888
sp|Q92522|H1X_HUMAN	2	168.08	3.88538e+06	3.49388e+06	3.83081e+06	0.899237	0.985956
sp|Q9Y2X3|NOP58_HUMAN	8	502.02	1.27985e+06	1.14989e+06	1.33035e+06	0.898456	1.03946
sp|Q15046|SYK_HUMAN	11	788.87	3.67402e+06	3.30064e+06	3.68088e+06	0.898372	1.00187
sp|P52298|NCBP2_HUMAN	2	92.47	1.23571e+06	1.10813e+06	871761	0.896759	0.705476
sp|Q12894|IFRD2_HUMAN	2	112.55	120848	108239	129536	0.895665	1.0719
sp|Q14011|CIRBP_HUMAN	1	77.46	114962	102856	127802	0.894695	1.11169
sp|Q9UII4|HERC5_HUMAN	1	53.91	60159.9	53786.5	55649.9	0.89406	0.925034
sp|P62829|RL23_HUMAN	5	529.36	3.19002e+07	2.84889e+07	2.90846e+07	0.893062	0.911738
sp|Q9H0A0|NAT10_HUMAN	15	1146.05	4.92317e+06	4.3924e+06	4.94672e+06	0.892191	1.00479
sp|P62277|RS13_HUMAN	11	813.99	5.37915e+07	4.79838e+07	5.58088e+07	0.892033	1.0375
sp|Q96EP5|DAZP1_HUMAN	1	79.71	182748	162819	145907	0.89095	0.798407
sp|P54136|SYRC_HUMAN	13	920.93	3.59137e+06	3.19586e+06	3.51511e+06	0.889874	0.978767
sp|Q9P2N5|RBM27_HUMAN	1	71.52	104620	93088.8	111834	0.88978	1.06896
sp|P17480|UBF1_HUMAN	3	135.18	294189	261713	313406	0.889609	1.06532
sp|Q14103|HNRPD_HUMAN	5	326.39	1.03552e+06	920966	1.01603e+06	0.889373	0.981173
sp|Q9H4Z2|ZN335_HUMAN	1	101.67	16580.8	14741.5	17395.1	0.889068	1.04911
sp|P14868|SYDC_HUMAN	12	777.23	3.20607e+06	2.84892e+06	2.94355e+06	0.888604	0.91812
sp|Q07021|C1QBP_HUMAN	5	437.44	1.03582e+06	919436	5.52256e+06	0.887641	5.33158
sp|Q15366|PCBP2_HUMAN	1	35.28	137204	121717	116114	0.887122	0.846287
sp|Q8TDN6|BRX1_HUMAN	9	577.34	2.69631e+06	2.39068e+06	2.80105e+06	0.886651	1.03885
sp|P08727|K1C19_HUMAN	10	728.68	3.2761e+06	2.89607e+06	3.5449e+06	0.883998	1.08205
sp|Q9UNQ2|DIM1_HUMAN	7	582.75	3.17111e+06	2.80001e+06	3.61305e+06	0.882976	1.13936
sp|Q9Y265|RUVB1_HUMAN	5	318.89	350166	308379	411793	0.880664	1.17599
sp|Q9Y3C1|NOP16_HUMAN	4	212.13	891992	785292	771630	0.880381	0.865064
sp|Q9NQT4|EXOS5_HUMAN	3	181.7	246800	217129	119369	0.879777	0.483668
sp|Q15527|SURF2_HUMAN	4	388.28	1.40251e+06	1.23246e+06	1.18262e+06	0.878754	0.843214
sp|P62913|RL11_HUMAN	8	647.62	3.74649e+07	3.28105e+07	3.71342e+07	0.875767	0.991173
sp|Q9UKD2|MRT4_HUMAN	5	316.05	1.55606e+06	1.36038e+06	1.43152e+06	0.874247	0.919961
sp|P84103|SRSF3_HUMAN	1	43.43	983575	859727	1.05483e+06	0.874083	1.07245
sp|Q9NX24|NHP2_HUMAN	3	263.33	680449	592305	659041	0.870462	0.968539
sp|Q13595|TRA2A_HUMAN	1	53.87	124504	108309	122854	0.869923	0.98675
sp|Q9Y399|RT02_HUMAN	3	189.64	1.47433e+06	1.28202e+06	1.6411e+06	0.869556	1.11311
sp|Q9H7E9|CH033_HUMAN	1	80.28	73358.4	63454.8	84423.7	0.864996	1.15084
sp|P42677|RS27_HUMAN	4	310.69	1.35458e+07	1.16857e+07	1.36046e+07	0.862681	1.00434
sp|Q9NXG2|THUM1_HUMAN	1	67.88	131028	113021	128616	0.862571	0.981585
sp|P63208|SKP1_HUMAN	1	42.1	30881.3	26610.4	35142.1	0.861699	1.13797
sp|Q01780|EXOSX_HUMAN	2	100.99	74171.8	63811.9	62338.4	0.860325	0.840459
sp|Q9GZR2|REXO4_HUMAN	1	70.29	73304.7	62792.4	74685.5	0.856594	1.01884
sp|Q13148|TADBP_HUMAN	2	76.35	93470.7	79896.9	86255	0.85478	0.922802
sp|Q7RTV0|PHF5A_HUMAN	2	139.97	411427	350182	375346	0.85114	0.912302
sp|P42285|SK2L2_HUMAN	1	52.08	72318.1	61510.1	62153.1	0.85055	0.859441
sp|Q16629|SRSF7_HUMAN	3	277.64	6.5676e+06	5.56598e+06	6.92987e+06	0.847491	1.05516
sp|Q14498|RBM39_HUMAN	8	546.19	1.88556e+06	1.59123e+06	2.00467e+06	0.843901	1.06317
sp|O75940|SPF30_HUMAN	1	67.61	108706	91701.6	124541	0.843574	1.14567
sp|Q12789|TF3C1_HUMAN	1	32.33	28463.1	23955.2	33124.3	0.841625	1.16376
sp|O00488|ZN593_HUMAN	1	54.08	257971	216737	276837	0.84016	1.07314
sp|P67809|YBOX1_HUMAN	16	1786.86	1.0631e+08	8.92186e+07	9.93084e+07	0.83923	0.93414
sp|Q92499|DDX1_HUMAN	7	541.24	1.03364e+06	864931	984456	0.836784	0.952419
sp|Q9H0D6|XRN2_HUMAN	2	132.66	203621	170116	211748	0.835455	1.03992
sp|P09651|ROA1_HUMAN	8	781.17	8.60092e+06	7.18302e+06	1.31341e+07	0.835146	1.52706
sp|P62314|SMD1_HUMAN	2	260.37	6.51548e+06	5.4399e+06	5.6174e+06	0.83492	0.862162
sp|Q8NB90|SPAT5_HUMAN	7	434.85	676559	563234	557411	0.832498	0.823891
sp|Q6P158|DHX57_HUMAN	10	628.16	1.41747e+06	1.17698e+06	1.29272e+06	0.83034	0.911991
sp|Q9BRP8|PYM1_HUMAN	1	70.68	31213.1	25860.2	25469.6	0.828504	0.815992
sp|Q13151|ROA0_HUMAN	4	402.74	3.30982e+06	2.73942e+06	5.07591e+06	0.827664	1.53359
sp|P55884|EIF3B_HUMAN	3	166.59	129960	107523	131577	0.82735	1.01244
sp|Q13442|HAP28_HUMAN	3	194.03	1.92208e+06	1.58905e+06	1.775e+06	0.826734	0.923475
sp|Q7Z2T5|TRM1L_HUMAN	5	367.5	789179	652149	746110	0.826364	0.945425
sp|Q9BTD8|RBM42_HUMAN	3	208.22	821346	678241	804907	0.825767	0.979985
sp|Q9Y3I0|RTCB_HUMAN	4	300.13	323858	266564	358592	0.82309	1.10725
sp|Q13155|AIMP2_HUMAN	4	308.5	1.41139e+06	1.16098e+06	1.41622e+06	0.822584	1.00342
sp|P25705|ATPA_HUMAN	2	168	85108.1	69997.5	58060.4	0.822454	0.682196
sp|Q96CT7|CC124_HUMAN	4	256.11	463639	381311	456679	0.82243	0.984988
sp|Q6UN15|FIP1_HUMAN	2	103.41	85211.8	69651.1	85147.6	0.817388	0.999246
sp|Q4U2R6|RM51_HUMAN	1	71.05	222333	181404	265018	0.815914	1.19199
sp|P41252|SYIC_HUMAN	23	1511.16	6.14358e+06	5.01229e+06	5.6764e+06	0.815858	0.923957
sp|O15226|NKRF_HUMAN	5	297.16	493276	401326	520862	0.813592	1.05592
sp|Q9P2J5|SYLC_HUMAN	19	1234.9	5.80365e+06	4.70508e+06	5.74799e+06	0.810711	0.990409
sp|Q5T5P2|SKT_HUMAN	1	31.19	184985	149632	236036	0.808885	1.27598
sp|P62847|RS24_HUMAN	5	352.31	1.55544e+07	1.24759e+07	1.83857e+07	0.802081	1.18203
sp|Q15365|PCBP1_HUMAN	5	335.54	589557	472852	470597	0.802045	0.798221
sp|Q9NTK5|OLA1_HUMAN	11	1010.73	1.19527e+07	9.57377e+06	1.11395e+07	0.800971	0.931963
sp|Q7L0Y3|MRRP1_HUMAN	1	67.76	79476.4	63574.7	63893.5	0.799919	0.80393
sp|Q8NHQ9|DDX55_HUMAN	6	402.21	721896	576629	734581	0.798771	1.01757
sp|Q96I59|SYNM_HUMAN	6	421.83	5.38135e+06	4.28092e+06	5.50047e+06	0.795512	1.02214
sp|Q15717|ELAV1_HUMAN	4	264.48	805288	638251	637226	0.792576	0.791302
sp|O75569|PRKRA_HUMAN	7	513.59	3.58845e+06	2.8378e+06	3.62995e+06	0.790815	1.01156
sp|P36915|GNL1_HUMAN	2	111.36	133161	105285	132264	0.790658	0.993262
sp|Q13428|TCOF_HUMAN	3	276.53	1.5849e+06	1.25247e+06	1.64394e+06	0.790254	1.03725
sp|Q9NW13|RBM28_HUMAN	6	444.51	1.78705e+06	1.40705e+06	1.67786e+06	0.78736	0.938901
sp|O60832|DKC1_HUMAN	7	333.67	1.63918e+06	1.28169e+06	1.46486e+06	0.781909	0.893654
sp|A0AV96|RBM47_HUMAN	2	90.1	156879	122632	148203	0.7817	0.944698
sp|O43143|DHX15_HUMAN	6	311.18	2.14083e+06	1.67043e+06	2.00817e+06	0.78027	0.938031
sp|Q8WVM0|TFB1M_HUMAN	4	215.03	233971	181580	273126	0.776079	1.16735
sp|P26599|PTBP1_HUMAN	5	447.5	974623	754269	926832	0.773908	0.950964
sp|Q6PCB5|RSBNL_HUMAN	2	133.33	276408	212739	342500	0.769656	1.23911
sp|Q5T280|CI114_HUMAN	4	314.54	870293	666143	870531	0.765424	1.00027
sp|Q96PY5|FMNL2_HUMAN	1	43.69	80671.4	61685.3	67864	0.764648	0.841239
sp|Q08J23|NSUN2_HUMAN	3	190.6	297129	226193	400897	0.761263	1.34923
sp|Q7KZF4|SND1_HUMAN	28	2394.97	2.27512e+07	1.72901e+07	2.09767e+07	0.759966	0.922006
sp|Q9Y4B6|VPRBP_HUMAN	2	110.04	18122.1	13769.9	23042	0.759841	1.27148
sp|Q9UQ80|PA2G4_HUMAN	6	291.46	830105	629617	946348	0.758478	1.14003
sp|Q9NP64|NO40_HUMAN	1	33.89	58014.2	43822.8	84924.7	0.75538	1.46386
sp|P35268|RL22_HUMAN	3	370.24	3.05188e+07	2.3025e+07	2.84788e+07	0.754453	0.933158
sp|Q07955|SRSF1_HUMAN	7	416.94	5.77003e+06	4.34277e+06	5.19412e+06	0.752642	0.900189
sp|Q15633|TRBP2_HUMAN	3	147.67	468559	352214	439075	0.751697	0.937075
sp|Q9H814|PHAX_HUMAN	2	88.53	201736	151579	124738	0.75137	0.618323
sp|P61587|RND3_HUMAN	1	75.01	119417	89607.3	90701.9	0.750374	0.75954
sp|P56192|SYMC_HUMAN	12	849.04	3.4141e+06	2.53604e+06	2.75355e+06	0.742814	0.806524
sp|Q9NVN8|GNL3L_HUMAN	1	58.51	38148.4	28322	41799	0.742417	1.09569
sp|Q12904|AIMP1_HUMAN	8	564.63	2.00959e+06	1.48262e+06	1.54059e+06	0.737772	0.766618
sp|Q99829|CPNE1_HUMAN	3	300.37	1.35879e+06	999814	1.4928e+06	0.735811	1.09862
sp|Q7L2E3|DHX30_HUMAN	19	1300.14	6.67445e+06	4.88803e+06	6.25427e+06	0.732349	0.937047
sp|Q08170|SRSF4_HUMAN	1	57.04	66360.7	48366.5	38939.2	0.728842	0.58678
sp|Q9NY12|GAR1_HUMAN	3	248.56	1.25031e+06	911256	948153	0.728823	0.758334
sp|P78362|SRPK2_HUMAN	1	63.33	65993.9	48071.4	55725.4	0.728422	0.844402
sp|Q8NFW8|NEUA_HUMAN	1	64.76	24934.6	18065.7	29552.8	0.724521	1.18521
sp|Q8WXA9|SREK1_HUMAN	1	57.91	64527.7	46691.3	44258.5	0.723586	0.685884
sp|Q9H6F5|CCD86_HUMAN	1	34.93	10252.3	7399.91	4957.03	0.721777	0.483502
sp|Q9NPD3|EXOS4_HUMAN	1	63.72	43778.6	31551.1	45469.8	0.720697	1.03863
sp|P11387|TOP1_HUMAN	9	625.86	2.61871e+06	1.88716e+06	3.46661e+06	0.720645	1.32379
sp|O75131|CPNE3_HUMAN	5	299.78	446393	320867	390306	0.7188	0.874356
sp|Q9BRT6|LLPH_HUMAN	1	65.24	151238	107561	94736.9	0.711205	0.626408
sp|P10155|RO60_HUMAN	9	554.72	855997	608023	744471	0.710309	0.869711
sp|P62304|RUXE_HUMAN	3	183.16	1.28132e+06	905915	1.14912e+06	0.707016	0.896823
sp|P35659|DEK_HUMAN	1	51.32	208589	147136	210207	0.705388	1.00776
sp|O60684|IMA7_HUMAN	1	57.95	9233.87	6511.97	10147.5	0.705227	1.09895
sp|P62318|SMD3_HUMAN	4	351.77	2.30544e+06	1.61873e+06	1.78574e+06	0.702132	0.774576
sp|P62841|RS15_HUMAN	8	861.02	1.67223e+07	1.16928e+07	1.80288e+07	0.699235	1.07813
sp|Q9H8H2|DDX31_HUMAN	5	272.3	303350	211338	277650	0.69668	0.915281
sp|Q15572|TAF1C_HUMAN	2	115.79	1.11493e+06	776394	787258	0.69636	0.706104
sp|Q9HD40|SPCS_HUMAN	3	172.74	193872	133910	139692	0.690714	0.720538
sp|P20290|BTF3_HUMAN	2	115.42	143937	98193.1	46473.9	0.682196	0.322878
sp|P16989|YBOX3_HUMAN	6	479.07	3.42836e+06	2.32912e+06	2.90829e+06	0.679369	0.848304
sp|Q15070|OXA1L_HUMAN	1	42.74	179582	121284	120958	0.675367	0.673554
sp|P07305|H10_HUMAN	1	69.5	330899	223164	364261	0.674416	1.10082
sp|P35637|FUS_HUMAN	3	182.95	148456	99846.9	171342	0.672568	1.15416
sp|P47897|SYQ_HUMAN	17	1254.42	4.38185e+06	2.92899e+06	3.34358e+06	0.668436	0.763052
sp|O75494|SRS10_HUMAN	2	122.58	230896	154147	187705	0.667607	0.812945
sp|Q96SB4|SRPK1_HUMAN	1	50.06	101272	67212	99595	0.66368	0.983443
sp|Q9BVI4|NOC4L_HUMAN	2	133.48	153817	101992	103688	0.663074	0.674096
sp|Q8N5C6|SRBD1_HUMAN	1	50.36	8583.64	5659.47	4549.5	0.659333	0.53002
sp|O43324|MCA3_HUMAN	1	73.1	321842	212133	271202	0.659122	0.842656
sp|Q9GZS1|RPA49_HUMAN	1	56.49	77316.3	50446.6	81897.2	0.652471	1.05925
sp|Q96KR1|ZFR_HUMAN	2	147.39	213068	137495	231576	0.64531	1.08686
sp|O60506|HNRPQ_HUMAN	9	601.13	2.62174e+06	1.69141e+06	2.07008e+06	0.645147	0.789584
sp|Q2Q1W2|LIN41_HUMAN	11	852.98	3.37008e+06	2.15315e+06	2.56352e+06	0.638903	0.760671
sp|P62306|RUXF_HUMAN	1	58.36	125866	79672.6	103863	0.632997	0.825188
sp|Q9Y2T2|AP3M1_HUMAN	1	31.6	14925	9434.06	26469.1	0.632099	1.77347
sp|Q7Z4Q2|HEAT3_HUMAN	2	105.67	86383.1	54522.9	97665.1	0.631175	1.1306
sp|Q00577|PURA_HUMAN	8	610.88	5.50056e+06	3.42592e+06	4.31935e+06	0.62283	0.785256
sp|O43390|HNRPR_HUMAN	14	1079.61	7.25039e+06	4.4706e+06	5.80554e+06	0.616601	0.800721
sp|P41091|IF2G_HUMAN	2	130.37	99306.3	61189.4	50903.1	0.616169	0.512587
sp|P18583|SON_HUMAN	2	96.98	72682.7	44573.5	52012.6	0.613262	0.715612
sp|Q96QR8|PURB_HUMAN	2	167.33	385714	234823	286346	0.6088	0.742379
sp|Q9H089|LSG1_HUMAN	1	81.07	240524	145666	310097	0.605621	1.28925
sp|Q15233|NONO_HUMAN	2	98.81	52847.2	31989.3	39083.5	0.605317	0.739557
sp|Q14694|UBP10_HUMAN	3	176.13	148670	89628	82829.9	0.602867	0.557141
sp|O95232|LC7L3_HUMAN	2	141.66	97705.3	58323.1	65343.5	0.596929	0.668782
sp|P62308|RUXG_HUMAN	2	116.11	372272	221533	320031	0.595083	0.859669
sp|Q9Y224|CN166_HUMAN	3	180.83	543032	322483	346967	0.593856	0.638944
sp|Q96GM8|TOE1_HUMAN	2	91.17	101282	59983.9	74074.7	0.592243	0.731368
sp|O75643|U520_HUMAN	2	72.31	26591.1	14902.1	23336.3	0.560416	0.877598
sp|P08579|RU2B_HUMAN	3	266.1	809830	444514	501530	0.548899	0.619303
sp|O95793|STAU1_HUMAN	13	859.19	4.85097e+06	2.65655e+06	3.37663e+06	0.547634	0.696073
sp|P53999|TCP4_HUMAN	1	30.12	177947	95763.9	144496	0.538161	0.812018
sp|Q08211|DHX9_HUMAN	34	2817.17	3.6512e+07	1.95538e+07	4.52297e+07	0.535545	1.23876
sp|P05455|LA_HUMAN	18	1360.4	4.03725e+07	2.11735e+07	2.6072e+07	0.524452	0.645787
sp|Q1KMD3|HNRL2_HUMAN	2	135.19	169280	87314.5	82868.1	0.515799	0.489532
sp|P19338|NUCL_HUMAN	22	1939.01	1.61332e+08	8.27796e+07	1.19115e+08	0.513101	0.73832
sp|Q9HCM4|E41L5_HUMAN	4	219.01	637564	323034	454484	0.506669	0.712845
sp|P31942|HNRH3_HUMAN	1	67.12	91833.8	46311.6	36575.8	0.504298	0.398282
sp|P68104|EF1A1_HUMAN	1	77.97	252750	127338	189534	0.50381	0.749888
sp|Q9Y3B4|SF3B6_HUMAN	2	92.37	84321.7	41867.2	59352	0.496517	0.703876
sp|Q96PM9|Z385A_HUMAN	2	165.82	98303.4	48708.4	36535.7	0.49549	0.371663
sp|Q9UPY3|DICER_HUMAN	10	675.51	630173	311520	439612	0.49434	0.697605
sp|P49756|RBM25_HUMAN	1	64.62	32613	16104.5	17812.1	0.493806	0.546166
sp|Q9UL40|ZN346_HUMAN	3	185.21	549127	266346	317948	0.485036	0.579006
sp|O95777|LSM8_HUMAN	1	55.55	3245.71	1569.05	2328.57	0.483424	0.71743
sp|Q9Y383|LC7L2_HUMAN	2	128.73	266112	128435	135885	0.482635	0.510633
sp|Q01130|SRSF2_HUMAN	2	110.42	342251	160888	253233	0.470087	0.739904
sp|P52597|HNRPF_HUMAN	7	642.27	9.24904e+06	4.11501e+06	4.43101e+06	0.444913	0.479077
sp|O75152|ZC11A_HUMAN	3	157.16	606132	262435	331467	0.432966	0.546857
sp|P31943|HNRH1_HUMAN	5	385.53	3.64655e+06	1.51035e+06	1.59051e+06	0.414187	0.436168
sp|Q9BVQ7|SPA5L_HUMAN	1	39.03	67604.8	27282.5	6008.22	0.403559	0.0888726
sp|P78358|CTG1B_HUMAN	1	33.36	21165.3	7388.14	14641.4	0.349069	0.691763
sp|Q7Z2W4|ZCCHV_HUMAN	2	142.91	805833	278925	193137	0.346132	0.239674
sp|P55265|DSRAD_HUMAN	8	546.69	1.05682e+06	365290	591611	0.345649	0.559802
sp|Q99729|ROAA_HUMAN	5	326.89	1.49985e+06	515789	719482	0.343894	0.479702
sp|P62633|CNBP_HUMAN	2	96.21	170944	57423.8	71869.3	0.335923	0.420427
sp|P09234|RU1C_HUMAN	2	111.05	787216	243243	409126	0.308992	0.519712
sp|Q8TB72|PUM2_HUMAN	1	38.14	91077.9	27718.5	43568.9	0.304338	0.478369
sp|Q96DH6|MSI2H_HUMAN	1	66.43	97382	29436.6	36005.7	0.302279	0.369737
sp|P08621|RU17_HUMAN	3	197.92	212121	62221.2	82625.9	0.293329	0.389523
sp|Q6ZN17|LN28B_HUMAN	9	792.68	2.78424e+07	8.06576e+06	1.1321e+07	0.289693	0.406611
sp|Q96PK6|RBM14_HUMAN	3	254.24	3.24738e+06	924180	1.38319e+06	0.284592	0.425939
sp|Q96SI9|STRBP_HUMAN	8	679.25	873036	243505	319420	0.278918	0.365873
sp|P19525|E2AK2_HUMAN	6	500.83	575053	159825	407433	0.277931	0.708514
sp|Q86U42|PABP2_HUMAN	3	282.15	3.53892e+06	975102	1.22844e+06	0.275536	0.347122
sp|P04264|K2C1_HUMAN	16	1195.14	6.75284e+06	1.75724e+06	1.51628e+07	0.260222	2.2454
sp|P13010|XRCC5_HUMAN	2	115.1	65776.4	17005.1	10148.2	0.258529	0.154284
sp|Q12905|ILF2_HUMAN	14	1624.43	2.64397e+07	6.19202e+06	1.2324e+07	0.234194	0.466117
sp|Q12906|ILF3_HUMAN	29	2428.54	2.0777e+07	4.64927e+06	9.06842e+06	0.223771	0.436465
sp|Q12849|GRSF1_HUMAN	8	635.97	1.01833e+07	1.56698e+06	2.39913e+06	0.153878	0.235595
sp|Q9H9Z2|LN28A_HUMAN	6	481.67	5.80722e+06	810090	1.03718e+06	0.139497	0.178601
sp|P13647|K2C5_HUMAN	3	176.93	168130	17407.3	316517	0.103535	1.88257
sp|P13645|K1C10_HUMAN	11	968.54	2.14912e+06	212757	7.50346e+06	0.0989975	3.49141
sp|Q96FX7|TRM61_HUMAN	1	60.6	49138	4093.26	13405	0.0833013	0.272803
sp|Q96CM3|RUSD4_HUMAN	1	37.94	27700.9	2278.26	3860.69	0.0822452	0.139371
sp|P35527|K1C9_HUMAN	11	881.59	4.07603e+06	280031	6.60799e+06	0.0687019	1.62118
sp|P98179|RBM3_HUMAN	1	65.37	541558	23266.4	49427.9	0.042962	0.0912699
sp|P35908|K22E_HUMAN	2	95.53	87979.2	3776.39	135222	0.0429237	1.53698
sp|Q9H2U1|DHX36_HUMAN	5	382.64	1.2367e+06	48354.2	82500.1	0.0390994	0.06671
sp|P84243|H33_HUMAN	1	87.46	421119	15846.5	25863.3	0.0376295	0.0614158
sp|P22532|SPR2D_HUMAN	1	38.06	1107.06	4.88903	16285.1	0.00441623	14.7102
sp|Q9C005|DPY30_HUMAN	1	64.34	8779.13	0	0	0	0
sp|Q8N3Z6|ZCHC7_HUMAN	1	40.21	30290.9	0	414.731	0	0.0136916
sp|Q96I51|WBS16_HUMAN	1	34.45	3328.46	0	854.461	0	0.256714
